1 **NanoAmpli-Seq: A workflow for amplicon sequencing for mixed microbial communities on**  
2 **the nanopore sequencing platform.**

3 Szymon T Calus<sup>1</sup>, Umer Z Ijaz<sup>1\*</sup>, Ameet J Pinto<sup>2\*</sup>

4  
5 Affiliations:

6 <sup>1</sup>School of Engineering, University of Glasgow, Glasgow, G12 8QQ, United Kingdom

7 <sup>2</sup>Department of Civil & Environmental Engineering, Northeastern University, 269 SN, 360  
8 Huntington Avenue, Boston, MA, USA

9  
10  
11  
12  
13  
14  
15  
16  
17  
18  
19  
20  
21  
22  
23  
24  
25  
26  
27  
28  
29  
30  
31

\* Correspondence to:

Ameet Pinto, Department of Civil & Environmental Engineering, Northeastern University.

[a.pinto@northeastern.edu](mailto:a.pinto@northeastern.edu)

Umer Ijaz, School of Engineering, University of Glasgow, UK. [umer.ijaz@glasgow.ac.uk](mailto:umer.ijaz@glasgow.ac.uk)

32 **Abstract**

33 **Background:** Amplicon sequencing on Illumina sequencing platforms leverages their deep  
34 sequencing and multiplexing capacity, but is limited in genetic resolution due to short read lengths.  
35 While Oxford Nanopore or Pacific Biosciences platforms overcome this limitation, their  
36 application has been limited due to higher error rates or smaller data output.

37 **Results:** In this study, we introduce an amplicon sequencing workflow, i.e., NanoAmpli-Seq, that  
38 builds on Intramolecular-ligated Nanopore Consensus Sequencing (INC-Seq) approach and  
39 demonstrate its application for full-length 16S rRNA gene sequencing. NanoAmpli-Seq includes  
40 vital improvements to the aforementioned protocol that reduces sample-processing time while  
41 significantly improving sequence accuracy. The developed protocol includes chopSeq software  
42 for fragmentation and read orientation correction of INC-Seq consensus reads while nanoClust  
43 algorithm was designed for read partitioning-based *de novo* clustering and within cluster consensus  
44 calling to obtain full-length 16S rRNA gene sequences.

45 **Conclusions:** NanoAmpli-Seq accurately estimates the diversity of tested mock communities with  
46 average sequence accuracy of 99.5% for 2D and 1D2 sequencing on the nanopore sequencing  
47 platform. Nearly all residual errors in NanoAmpli-Seq sequences originate from deletions in  
48 homopolymer regions, indicating that homopolymer aware basecalling or error correction may  
49 allow for sequencing accuracy comparable to short-read sequencing platforms.

50

51

52 **Keywords:** amplicon sequencing, nanopore sequencing, *de novo* analyses, sequencing accuracy

53

54

55

## 56 **Background**

57 Amplicon sequencing, particularly sequencing of the small subunit rRNA (SSU rRNA) gene and  
58 internal transcribed spacer (ITS) regions, is widely used for profiling of microbial community  
59 structure and membership [1-4]. The wide-scale application of amplicon sequencing has been  
60 driven mainly by the ability to multiplex 100's of samples on a single sequencing run and obtain  
61 millions of sequences of target communities on high-throughput sequencing platforms [1, 4]. The  
62 primary limitation of these commonly used technologies (i.e., Illumina's MiSeq, Ion Torrent PGM,  
63 etc.) is that their read lengths are short, ranging from 150-400 bp [5]. While excellent at bulk  
64 profiling of microbial communities through multiplexed deep sequencing, short read lengths are  
65 limited in the taxonomic resolution of sequenced reads and more so, are not amenable to robust  
66 phylogenetic analyses to assess the relationship between sequences originating from unknown  
67 microbes with those in publicly available databases. An important effect of the proliferation in  
68 short read sequencing applications has been a decrease in the rate at which long higher quality  
69 sequences, particularly of SSU rRNA genes, are being deposited in public databases. This effect  
70 is to some extent being mitigated through assembly and curation of near full-length SSU rRNA  
71 genes from metagenomic datasets [6-9] and will continue to be mitigated with novel approaches  
72 for SSU rRNA sequencing using synthetic long read approaches [10].

73

74 The introduction of long-read single molecule sequencing platforms, such as PacBio's single-  
75 molecule real-time sequencing (SMRT) and single molecule sensing technologies on the Oxford  
76 Nanopore Technologies (ONT) MinION<sup>TM</sup> platform, has opened the possibility of obtaining ultra-  
77 long reads [5, 11]. While sequencing throughput and raw data quality of long read single molecule  
78 sequencing approaches are yet to rival that of short read platforms, the ability to obtain ultra-long

79 reads can overcome several limitations of the latter [12]. For instance, long-read sequencing  
80 combined with various error correction approaches [13, 14] has been used to obtain high-quality  
81 single contig microbial genomes [14] or increase assembly quality of previously sequenced but  
82 fragmented eukaryotic genomes assemblies [15, 16], which was not feasible using short-read  
83 approaches. Long-read sequencing capabilities have also been recently leveraged to sequence near  
84 full-length SSU rRNA genes (e.g., 16S rRNA) [17-21] or even the entire *rrn* operon [20, 22].

85

86 A majority of the studies utilizing either the SMRT or nanopore sequencing platforms have limited  
87 data their analyses efforts to sequence classification, due to the fact that widely used sequence  
88 classifiers are tolerant of high sequencing error rates [23, 24]. However, these classification-only  
89 approaches are limited in their ability to differentiate between closely related sequences, risks false  
90 detections (i.e., read incorrectly classified at the family or genus levels due to high error rates),  
91 and are unable to identify organisms that are not represented in the reference databases. In contrast,  
92 some studies have gone beyond sequence classification by using consensus sequence construction  
93 to improve overall sequence accuracy. The consensus sequence creation efforts thus far can be  
94 categorized into two approaches. The first approach involves mapping raw, noisy reads to custom  
95 or publicly available reference databases (i.e., SILVA) [25]. Subsequently, reads mapping to the  
96 same reference sequence are then used for the semi-automated or manual construction of a  
97 consensus sequence using overlapping alignments [20, 22]. While this approach does result in  
98 improved accuracy of the consensus sequence, clustering of reads based on mapping of noisy reads  
99 to reference databases has significant limitations. First, incorrect read mapping to a reference is  
100 prevalent due to high error rates of raw reads. Second, the reliance on a reference database ensures  
101 that reads originating from organisms not represented in the reference database are ignored. The

102 more robust alternative towards high accuracy consensus sequence generation would be a  
103 completely *de novo* approach, i.e., generation of a consensus sequence without the use of any  
104 reference database.

105

106 To our knowledge, there are three reports of *de novo* data processing to reduce error rate from long  
107 read sequencing of amplicons from mixed microbial communities [17, 21, 26]. Both Singer et al  
108 [26] and Schloss et al [17] utilized the circular consensus sequencing approach of SMRT  
109 sequencing coupled with a range of quality filtering (i.e., mismatches to primer, quality scores)  
110 and sequence clustering (i.e., pre-cluster) to generate consensus sequences from reads clustered  
111 into operational taxonomic units (OTUs) and achieved error rates of 0.5% [26] and 0.027% [17]  
112 for full-length 16S rRNA gene sequencing libraries. For the later effort [17], the number of  
113 operational taxonomic units (OTUs) of the processed data were also highly similar to the  
114 theoretical number of OTUs in tested mock communities, indicating that the application of this  
115 protocol for naturally derived mixed microbial communities is likely to result in robust diversity  
116 estimates. Li et al. [21] developed Intramolecular-ligated Nanopore Consensus Sequencing (INC-  
117 Seq) protocol for consensus-based error correction of nanopore sequencing reads with a median  
118 accuracy of 97-98%. The INC-Seq workflow involves amplicon concatamerization to link multiple  
119 identical copies of the same amplicon on a single DNA molecule, sequencing of the  
120 concatamerized molecules using 2D sequencing chemistry on the nanopore sequencing platform,  
121 followed by consensus-based error correction after aligning the physically linked concatemers on  
122 each sequenced DNA strand. By using this approach, Li et al [21] were able to increase the median  
123 sequence accuracy of processed reads to 97-98%. While this significant improvement allowed for

124 taxonomic classification of sequences to the species level, it did not allow for sequence clustering  
125 for diversity estimation due to residual median error rates of approximately 2-3%.

126

127 In this study, we leverage and expand on the INC-Seq protocol developed by Li et al [21] to  
128 provide a complete workflow for amplicon sequencing and *de novo* data processing, NanoAmpli-  
129 Seq, applied to near full-length 16S rRNA gene of mock communities that results in high-quality  
130 sequences with a mean sequence accuracy of  $99.5\pm 0.08\%$ . The current version of NanoAmpli-  
131 Seq includes modifications to the library preparation protocol for INC-Seq and fixes a key issue  
132 with INC-Seq consensus sequences while adding a novel read partitioning-based sequence  
133 clustering approach which results in an accurate estimation of diversity of mixed microbial  
134 communities and results in higher sequence accuracy by allowing within OTU sequence alignment  
135 and consensus calling. Further, we demonstrate that NanoAmpli-Seq works equally well on the  
136 (now obsolete) 2D sequencing chemistry and the recently released 1D2 sequencing chemistry on  
137 the MinION<sup>TM</sup> device. While important limitations such as suboptimal re-construction of  
138 community structure and error rate of  $\sim 0.5\%$  remain, the proposed approach may be used for  
139 sequencing of long amplicons from complex microbial communities to assess community  
140 membership with cautious utilization of sequences from low abundance OTUs due to likely lower  
141 sequence accuracy ranging from 99-99.5% accuracy.

142

## 143 **Results**

144 **Experimental design and workflow.** The NanoAmpli-Seq protocol was developed and validated  
145 using amplicon pools consisting of near full-length 16S rRNA gene of a single organism (*Listeria*  
146 *monocytogenes*) or an equimolar amplicon pool of near full-length 16S rRNA genes from 10

147 organisms (Supplementary Table S1). The amplicon pools were generated by PCR amplifying near  
148 full-length 16S rRNA genes from genomic DNA of the target organism(s) using primers and PCR  
149 reaction conditions as described in the materials and methods section. The respective amplicon  
150 pools were subsequently prepared for sequencing using the INC-Seq workflow as outlined in  
151 Figure 1, with a few significant modifications. Briefly, the amplicon pools were self-ligated to  
152 form plasmid-like structures which was followed by digestion with plasmid-safe DNase to remove  
153 the remaining non-ligated linear amplicons. The DNA pool consisting of plasmid-like structures  
154 was subject to rolling circle amplification (RCA) using random hexamer-free protocol using a  
155 combination of primase/polymerase (PrimPol) and hi-fidelity Phi29 DNA polymerase [27]. The  
156 RCA product was subject to two rounds of T7 endonuclease I debranching and g-TUBE  
157 fragmentation followed by gap filling and DNA damage repair. Description of the protocol  
158 including reagent volumes and incubation conditions is provided in the materials and methods and  
159 a step-by-step protocol is provided in the supplementary text. The prepared amplicon pools for  
160 both single organism and 10 organism mock community samples were then subject to library  
161 preparation using the standard 2D (SQK-LSK208) (Runs 1 and 2) and 1D2 (SQK-LSK308) (Runs  
162 3 and 4) kits using ONT specifications and sequenced on the MinION<sup>TM</sup> MK1b device followed  
163 by basecalling using Albacore 1.2.4.

164

165

166

167

168

169

170

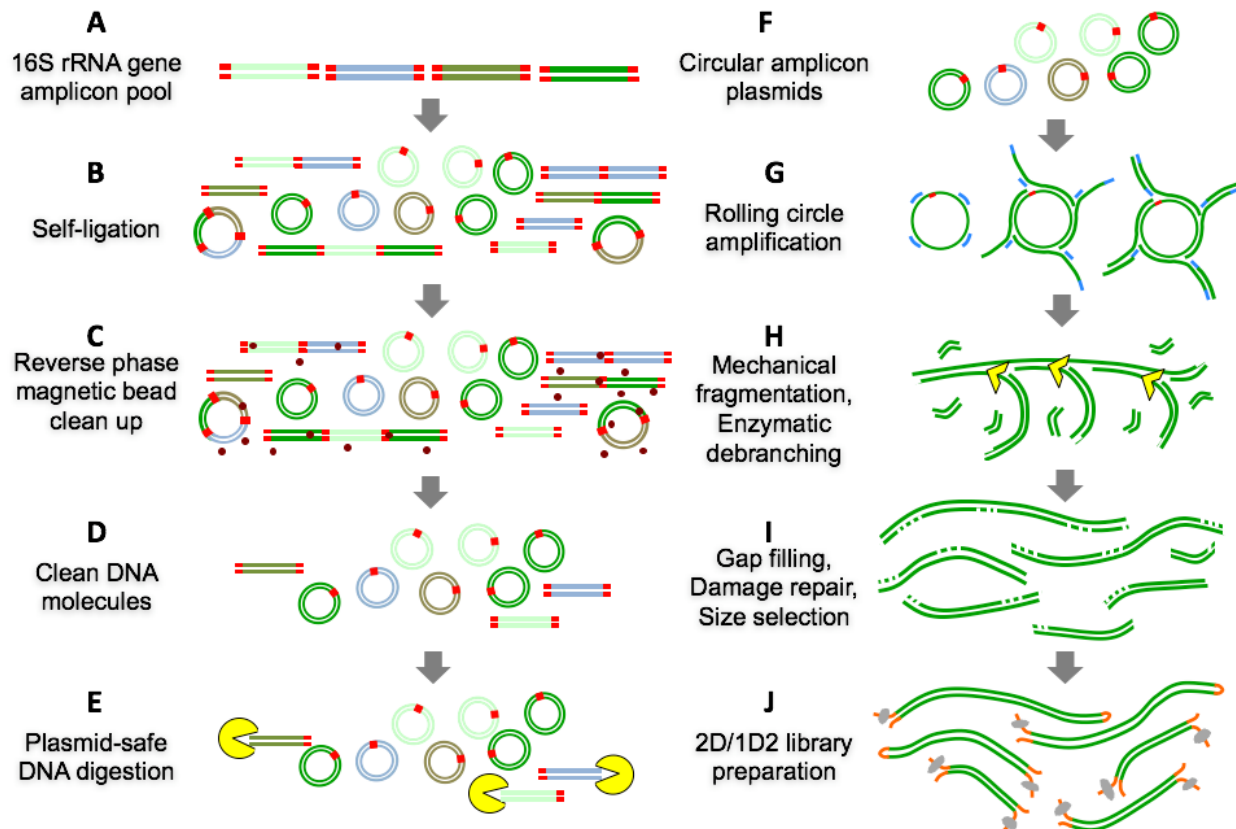

**Figure 1:** Overview of the sample preparation protocol for 16S rRNA gene pool preparation, plasmid-like structure preparation, enzymatic debranching and mechanical fragmentation, and 2D and 1D2 library preparation including intermediate clean-up steps.

171 Each resulting read consisted of multiple concatamerized physically linked amplicons from the  
172 one original 16S rRNA gene amplicon. The long concatamerized amplicon reads were subject to  
173 INC-Seq's anchor based alignment and consensus error correction using three different alignment  
174 options (i.e., blastn, Graphmap, and partial order alignment (POA)) and followed by iteratively  
175 running PBDAGCON on the consensus for error correction (INC-Seq flag "iterative"). Reads with  
176 irregular segment length, unmappable anchors, and potentially chimeric molecules (i.e.,  
177 concatemers from more than one original 16S rRNA gene amplicon) were removed during the  
178 generation of the INC-Seq consensus read. Manual inspection of INC-Seq consensus reads  
179 revealed that a vast majority had an incorrect orientation of primers (Figure 2A). Specifically, the



180 forward and reverse primers did not occur at the ends of the INC-Seq consensus reads but rather  
181 were co-located at varying positions along the length of each read. Efforts to manually split INC-  
182 Seq reads and re-orient the forward and reverse splits based on primer orientation revealed the  
183 presence of tandem repeats of nearly identical sequences, which affected efforts to merge the  
184 forward and reverse read splits (Figure 2B, 2C).  
185

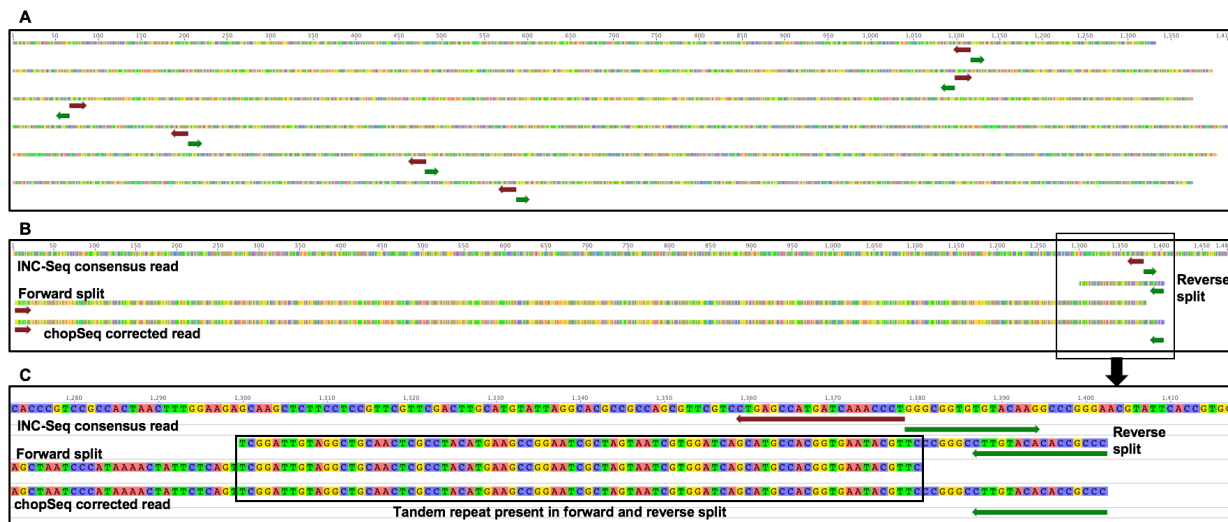

**Figure 2:** (A) Example of INC-Seq consensus reads showing the improper orientation with forward (maroon) and reverse (green) primers co-located and incorrectly oriented. (B) Manual splitting and re-orientation of the reads revealed the presence of tandem repeats in the forward and reverse splits which were identified and removed using chopSeq. (C) An expanded view of tandem repeat region in Figure 2B.

186  
187 To this end, we developed the chopSeq algorithm as part of the NanoAmpli-Seq workflow. The  
188 chopSeq algorithm uses pairwise2 open source library from Biopython package to identify user  
189 provided primers (forward “-f”, reverse “-r”) sequences including degenerate bases in the INC-  
190 Seq consensus reads. Primer detection is carried out in different orientations and primer match  
191 scores for each orientation are generated. Subsequently, primer sequences in the INC-Seq  
192 consensus read with the highest mean score are re-oriented and any overhang is removed. Re-  
193 orienting reads using primer orientation resulted in the identification of insertions consisting of  
194 repeated sequence patterns, i.e., tandem repeats. These tandem repeats were identified using

195 etandem algorithm from EMBOS open source software package  
196 (<http://emboss.bioinformatics.nl/cgi-bin/emboss/etandem>) and various features of these repeats  
197 were delineated, i.e. tandem minimum repeat, tandem maximum repeat, and mismatch rate. The  
198 percent identify between tandem repeat is estimated iteratively measuring the sequence similarity  
199 between co-occurring segments using window size ranging from 10 bp to 350 bp with diminishing  
200 sequence similarity threshold with increasing window size. The sequence similarity threshold with  
201 increasing window size was applied as longer tandem repeats tend to have lower similarity to each  
202 other compared to shorter. After completing re-orientation of reads in the removal of tandem  
203 repeats, the forward and reverse splits are merged into a single read, and any read that does not  
204 match prescribed length threshold (i.e., 1300-1450 bp) is discarded. This process of primer  
205 identification and tandem repeat removal can also be visualized by turning on verbosity mode (flag  
206 = -v) and the results can be exported in fasta format.

207  
208 To enable fully reference-free analyses, we developed the nanoClust algorithm which takes the  
209 fasta file of chopSeq corrected reads as input and then performs read-partitioning based *de novo*  
210 clustering using VSEARCH [28] to delineate OTUs at a user-specified sequence similarity  
211 threshold (i.e., 97% in this study) followed by within OTU read alignment and consensus calling  
212 for each OTU. The nanoClust algorithm is written in python and requires Biopython packages  
213 such as Seq, SeqIO, AlignIO, aligninfo and pairwise2. This algorithm was explicitly designed for  
214 *de novo* clustering because standard *de novo* clustering approaches such as VSEARCH [28] and  
215 the clustering approaches available in mothur [29, 30] vastly overestimated the richness of the  
216 mock community when using chopSeq corrected reads (see details below). The nanoClust  
217 algorithm takes chopSeq corrected reads in fasta format, splits the reads into partitions based on

218 user-defined partition size, implements VSEARCH [28] for dereplication, chimera detection and  
219 removal in each partition, and clustering for each partition to identify the partition category with  
220 optimal (i.e., maximum) number of OTUs (not counting singleton OTUs) and (3) discards  
221 singletons. Following this, nanoClust extracts read IDs for each OTU bin from the best performing  
222 partition, the extracted read IDs for each OTU bin are then used to obtain full-length chopSeq  
223 corrected reads, a subset of reads that fall within 10% of the average full-length read distribution  
224 within each OTU bin are aligned using Multiple Alignment using Fast Fourier Transform  
225 (MAFFT) [31, 32] with G-INS-i option, followed by consensus calling to obtain full-length  
226 representative sequence for each OTU. The entire data processing workflow is shown in Figure 3.

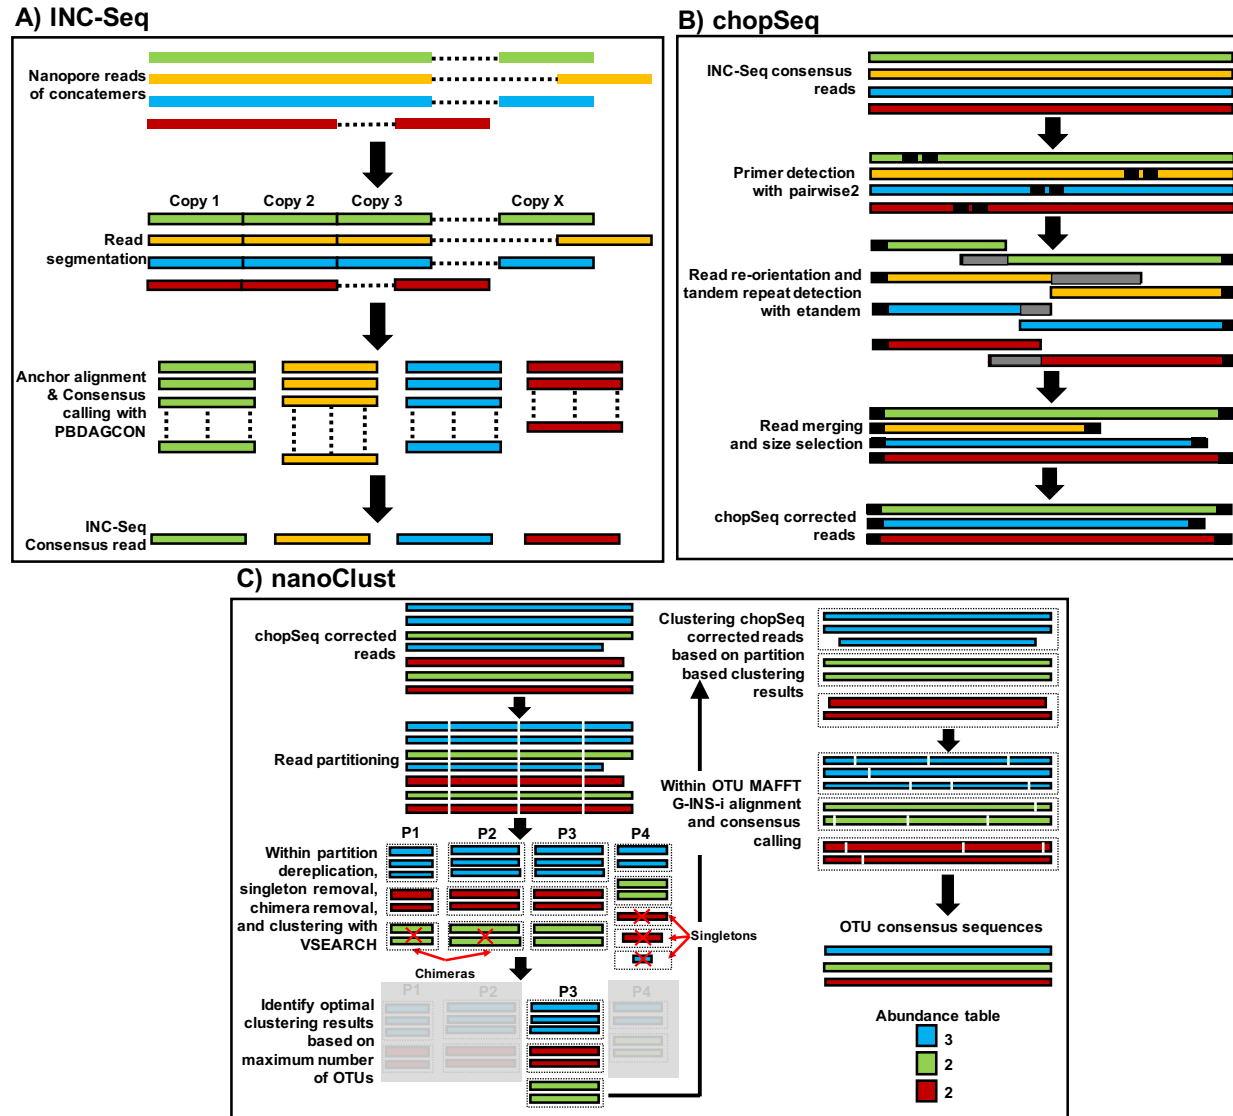

**Figure 3:** (A) Overview of the INC-Seq based anchor alignment and iterative consensus calling using PBDAGCON. (B) INC-Seq consensus reads were subject to chopSeq based read reorientation followed by tandem repeat removal and size selection to retain reads between 1300-1450bp. (C) chopSeq corrected reads are subject to partitioning followed by VSEARCH based binning to identify optimal binning results using partition that generates maximum number of OTUs (without singletons). MAFFT-G-INS-i was then used for sequence alignment of a subset of full length reads from each OTU bin for the best performing partition and the alignment was used to create the OTU consensus read.

228 **Modifications to the original INC-Seq protocol significantly reduces time required for**  
229 **amplicon concatemer pool preparation.** While the proposed DNA preparation protocol is based  
230 on the previously developed INC-Seq approach [21], it contains multiple improvements that allow  
231 for faster and more efficient library preparation. These modifications include reduced incubation  
232 times for self-ligation step and plasmid-safe DNase digestion process. More importantly, the  
233 current protocol utilizes Tth PrimPol [27] and Phi29 DNA polymerase enzymes for RCA which  
234 minimizes the formation of unspecific products that may occur when using random hexamers.  
235 Similarly, the NanoAmpli-Seq protocol utilizes T7 endonuclease I enzyme for enzymatic  
236 debranching of RCA product combined with mechanical fragmentation step involving use of the  
237 g-TUBE. Thus, while our protocol increases the number of intermediate steps for sample  
238 preparation, by optimizing each step, it reduces the overall time required for sample DNA  
239 preparation to 6 hours (approximately 70% reduction compared to the original INC-Seq protocol).  
240 These improvements not only result in analyses of near full-length 16S rRNA gene (i.e., twice the  
241 amplicon size of the previously developed INC-Seq approach), but the combination of the  
242 improved protocol with appropriate data processing modifications resulted in significant increase  
243 in high-quality data post-processing.

244

245 **NanoAmpli-Seq data yield for 2D and 1D2 experiments.** Runs 1, 2, 3, and 4 resulted in 29420,  
246 59490, 142233, and 301432 raw records with post basecalling read lengths ranging from 5bp to  
247 43kbp and 5bp to 234kbp for 2D and 1D2 sequencing protocols (Supplementary Figure S1). The  
248 pass reads to total raw reads ratio ranged from 28% for 2D and 7-9% for the 1D2 experiments  
249 (Table 1). It is unclear if the low yield of pass reads, particularly for the 1D2 experiments, were  
250 due to the concatemerization process, DNA damage during enzymatic debranching and

251 mechanical fragmentation that was unrepaired in the subsequent steps, or due to basecalling issues.  
 252 All pass reads were subjected to INC-Seq processing to allow for consensus-based error correction  
 253 using reads with a minimum of three concatemers per read (i.e., reads with less than three  
 254 concatemers were excluded for any subsequent analyses) as compared to six concatemer threshold  
 255 used by Li et al [21]. The number of concatemers per read passing INC-Seq threshold ranged from  
 256 3 to 21 and 3 to 42 for 2D and 1D2 data (Supplementary Figure S1). The total number of reads  
 257 passing the three concatemer threshold ranged from 36-75% of the base called reads depending on  
 258 the experiment, sequencing protocol, and alignment approach during INC-Seq processing (Table  
 259 1). This was significantly higher than those reported by Li et al [21], primarily due to the use of  
 260 three compared to six concatemer threshold recommended previously.

261 **Table 1:** Summary of the total number of reads and median read lengths at each step of the data  
 262 processing workflow for all experiments.

| Protocol            | Number of Reads |              |              |              | Median Read Length |              |              |              |
|---------------------|-----------------|--------------|--------------|--------------|--------------------|--------------|--------------|--------------|
|                     | 2D              | 1D2          | 2D           | 1D2          | 2D                 | 1D2          | 2D           | 1D2          |
| Experiment          | One organism    | One organism | Ten organism | Ten organism | One organism       | One organism | Ten organism | Ten organism |
| Run                 | 1               | 4            | 2            | 3            | 1                  | 4            | 2            | 3            |
| Raw records         | 29420           | 301432       | 59490        | 142233       | -                  | -            | -            | -            |
| Pass reads          | 8108            | 20888        | 16403        | 12011        | 4868               | 7305         | 5401         | 6418         |
| INC-Seq aligner     | <b>Blastn</b>   |              |              |              |                    |              |              |              |
| INC-Seq             | 3911            | 7618         | 7011         | 9081         | 1394               | 1433         | 1396         | 1413         |
| chopSeq             | 3911            | 7618         | 7011         | 9081         | 1383               | 1387         | 1377         | 1374         |
| chopSeq-size select | 3748            | 7288         | 5186         | 7265         | 1384               | 1388         | 1377         | 1375         |
| nanoClust           | 2997            | 6153         | 3677         | 5465         | 1396               | 1398         | 1384         | 1386         |
| INC-Seq aligner     | <b>Graphmap</b> |              |              |              |                    |              |              |              |
| INC-Seq             | 3902            | 7631         | 7004         | 9169         | 1400               | 1439         | 1401         | 1420         |
| chopSeq             | 3902            | 7631         | 7004         | 9169         | 1384               | 1388         | 1378         | 1377         |
| chopSeq-size select | 3765            | 7399         | 5190         | 7496         | 1384               | 1389         | 1377         | 1377         |
| nanoClust           | 2981            | 6179         | 4141         | 5490         | 1397               | 1396         | 1384         | 1386         |
| INC-Seq aligner     | <b>POA</b>      |              |              |              |                    |              |              |              |
| INC-Seq             | 3913            | 7643         | 7025         | 9191         | 1414               | 1457         | 1415         | 1443         |
| chopSeq             | 3913            | 7643         | 7025         | 9191         | 1394               | 1396         | 1386         | 1387         |
| chopSeq-size select | 3779            | 7088         | 5076         | 6954         | 1394               | 1396         | 1385         | 1386         |
| nanoClust           | 3184            | 5993         | 3916         | 5622         | 1398               | 1389         | 1384         | 1386         |

263

264 **INC-Seq processed reads demonstrated incorrect read orientation and presence of tandem**  
265 **repeats.** While the median read lengths for post INC-Seq were generally in the expected range  
266 (i.e., 1350-1450 bp) (Table 1) and similar for all three alignment methods used (Supplementary  
267 Figure 2), manual inspection of the reads revealed several instances of incorrect read orientation  
268 (Figure 2). The amplicon pool preparation protocol relies on RCA of plasmid-like structures  
269 constructed through self-ligation of linear amplicons followed by a combination of enzymatic  
270 debranching and mechanical fragmentation to generate linear molecules with multiple  
271 concatemers. Considering the fragmentation and debranching steps are not driven by sequence  
272 specificity, it would be reasonable to assume that the resulting linear amplicon is unlikely to have  
273 the correct orientation, i.e. 16S rRNA gene-specific forward and reverse primers do not flank the  
274 entire amplified region. Indeed, we found a vast majority of the 2D and 1D2 INC-Seq consensus  
275 reads were incorrectly oriented for the single organism sequencing runs, with forward and reverse  
276 primers not located at the ends of the reads. As a result, the reads were chopped at the primer sites  
277 and re-oriented to allow for the forward and reverse primers to be correctly oriented. However,  
278 during the process of read re-orientation, we also discovered the presence of inserts in the form of  
279 tandem repeats. Additional inspection of these inserts revealed that they were composed of  
280 multiple repetitive sequences, with the length of these inserts ranging from 10 bp to in excess of  
281 1500 bp (for rare cases) with median tandem repeat size ranging from 12 to 62 bp. The proportion  
282 of INC-Seq processed reads with tandem repeats varied from 60-75% but did not reveal any  
283 significant effect of type of aligner used during INC-Seq consensus calling or the sequencing  
284 chemistry itself. Interestingly, however, the length distribution for the tandem repeats was strongly  
285 associated with the sequencing chemistry (Figure 4).

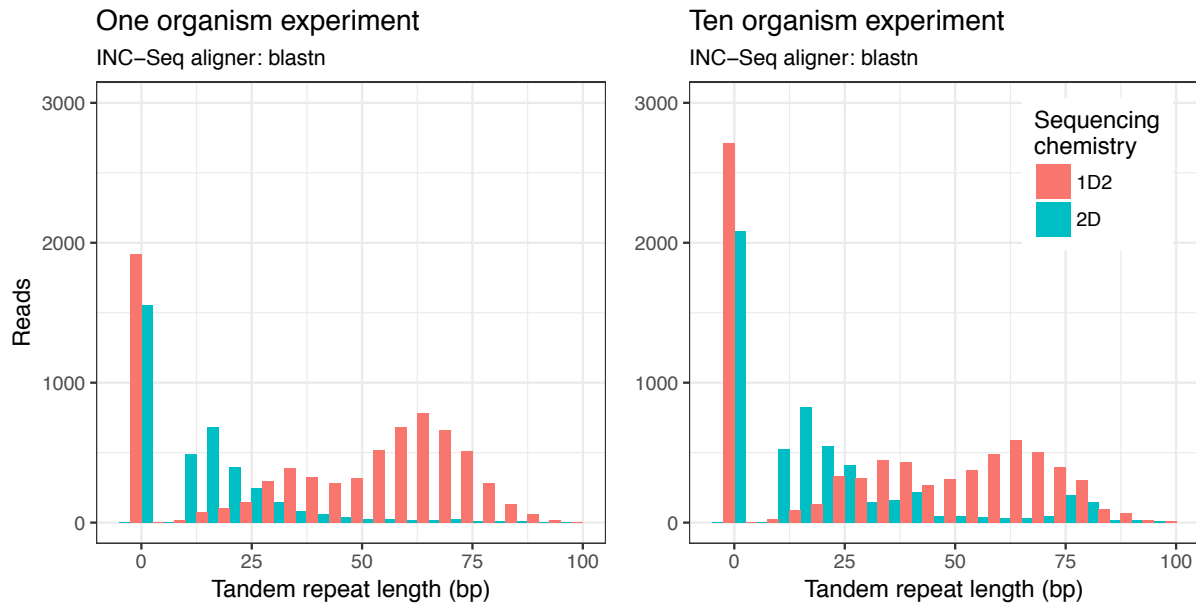

286

287 **Figure 4:** Histogram of tandem repeat length distribution of the INC-Seq processed reads did not show any effect of the aligner  
 288 used during the INC-Seq process, but rather a marked effect of the sequencing chemistry. Results are only shown for INC-Seq  
 289 consensus reads generated using blastn aligner.

290

291 Specifically, the 1D2 reads had longer tandem repeats as compared to the 2D reads and  
 292 demonstrated a bimodal distribution of tandem repeat lengths as compared to the 2D data which  
 293 showed a unimodal tandem repeat length distribution (Figure 4). While the template and  
 294 complements in the 2D sequencing chemistry are physically linked by a hairpin adapter, they are  
 295 not physically linked in the 1D2 sequencing chemistry; this could likely be the cause of differences  
 296 in tandem repeat length distribution between 2D and 1D2 experiments.

297

298 **Read re-orientation and tandem repeat removal significantly improves sequence quality.**

299 BLASTn analyses of INC-Seq reads against reference database composed of 16S rRNA gene  
 300 sequences of one (Run1 and Run4), or ten organisms (Run 2 and 3) revealed that a combination  
 301 of incorrect read orientation and presence of tandem repeats significantly affected overall sequence  
 302 quality. While the average sequence similarity between INC-Seq consensus reads and the reference



303 sequence was  $97\pm 0.37\%$ , the portion of the INC-Seq consensus read demonstrating a contiguous  
304 alignment to the reference sequence varied significantly (Figure 5); the remaining section of the  
305 read typically resulted in shorter secondary alignments with similar sequence similarity to that of  
306 the primary alignment. However, post chopSeq the average proportion of the read aligning to the  
307 reference sequences increased to  $96\pm 2.3\%$  with additional step of discarding reads less than 1300  
308 bp and greater than 1450 bp increasing the average proportion of the read aligned to  $98.4\pm 0.7\%$   
309 while the sequence similarity between chopSeq ( $97.5\pm 0.42\%$ ) and chopSeq followed by size  
310 selection (chopSeq\_SS) ( $98\pm 0.23\%$ ) remained similar to or slightly better than INC-Seq processed  
311 read. This demonstrates that read reorientation and tandem repeat removal resulted in  
312 reconstruction of reads with a high level of similarity to the reference sequences (Figures 5).

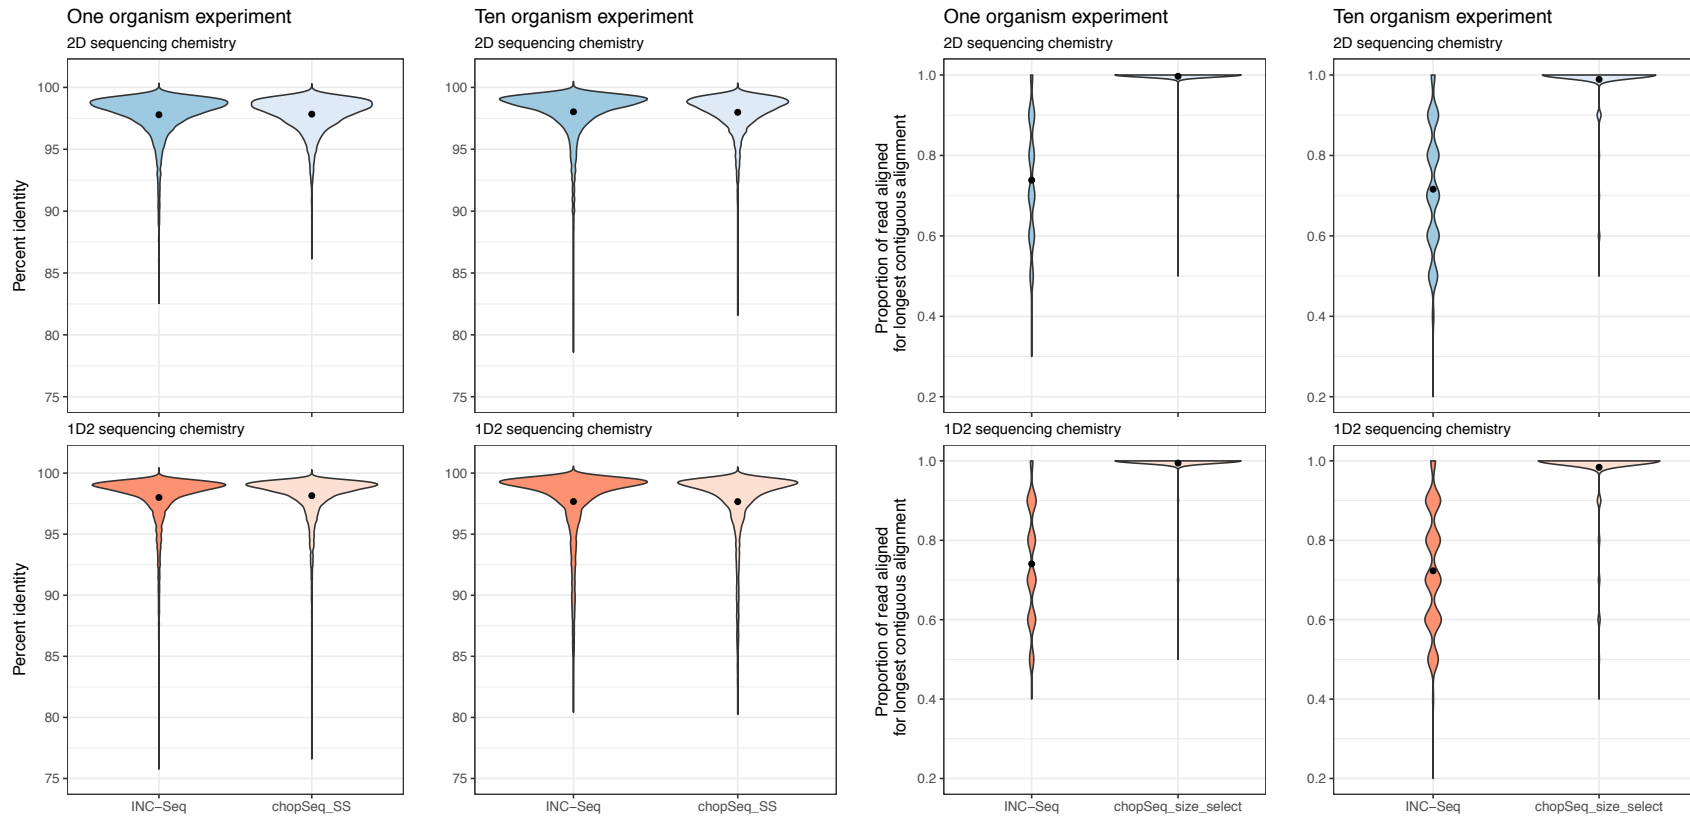

315 **Figure 5:** While the distribution of percent identities of INC-Seq and chopSeq processed reads (chopSeq\_SS) to reference sequences was on average 97-98%, variable lengths of  
 316 the INC-Seq processed reads aligned to the reference sequences. In contrast, nearly the entire length of the chopSeq processed reads aligned to the reference without  
 317 affecting overall sequence similarity. Results are only shown for INC-Seq reads generated using blastn aligner.

318 Inspections of the read to reference alignment length ratio indicated that the primary source of  
 319 sequence error for both INC-Seq and chopSeq corrected reads originated from deletions; i.e., the  
 320 majority of reads had a read to reference alignment ratio lower than 1. While deletions in reads  
 321 were also strongly associated with sequence accuracy for post chopSeq and size selected reads, a  
 322 small proportion of chopSeq corrected reads showed read to reference alignment ratios of greater  
 323 than 1 (Figure 6), suggesting that insertions were less prominent than deletions.

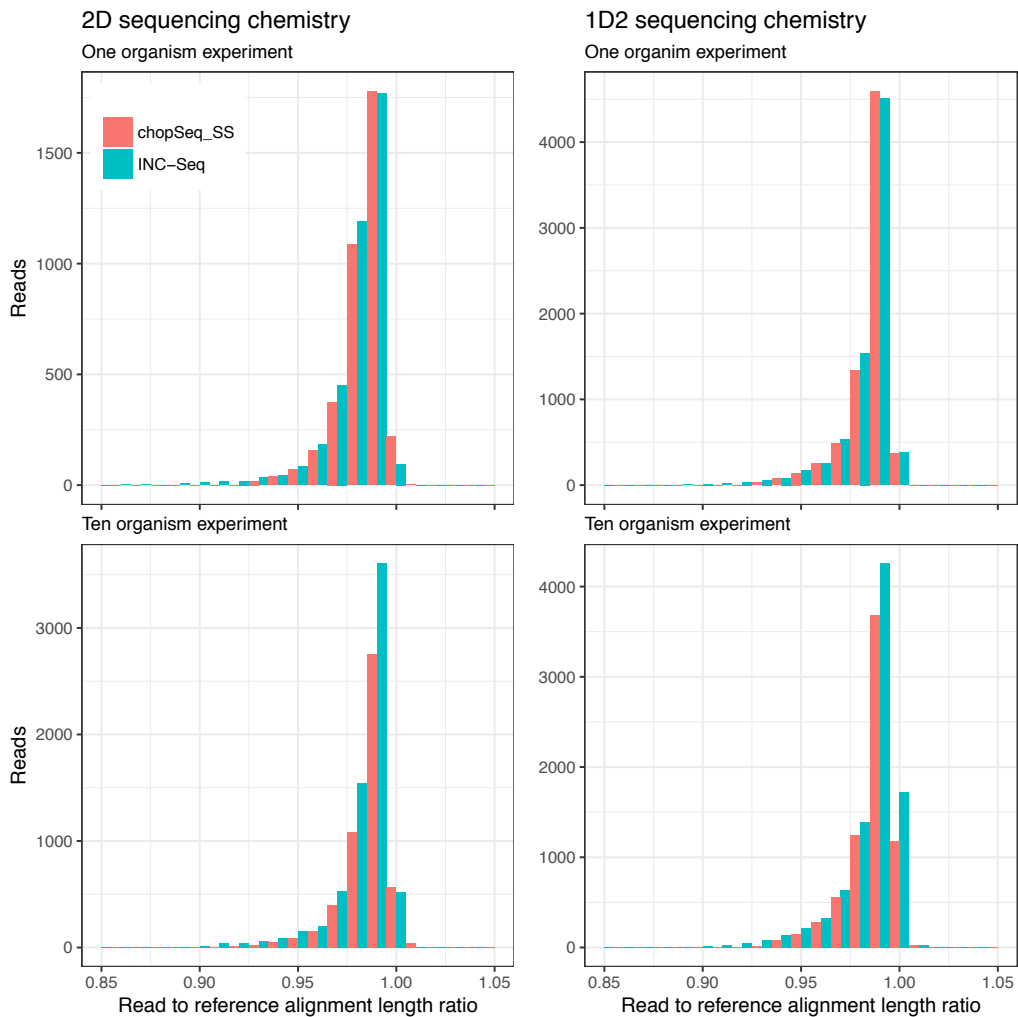

324

325 **Figure 6:** The ratio of the alignment length of INC-Seq and chopSeq corrected reads to that of the corresponding reference  
 326 sequences was consistently lower than 1, suggesting that deletions in the INC-Seq and chopSeq corrected reads were the primary  
 327 cause of dissimilarity with the reference sequences. Results are only shown for INC-Seq reads generated using blastn aligner.

328

329 ***De novo* clustering of chopSeq corrected sequences followed by within cluster consensus**  
330 **calling significantly enhances sequence accuracy.** The overall sequence accuracy increased to  
331 an average of  $97.9\pm 0.23\%$  following chopSeq read correction and size selection with  $98\pm 0.23\%$   
332 of the read aligning to the reference (Figure 5). However, approximately 5 and 10% of reads for  
333 the 2D and 1D2 runs, respectively, exhibited sequence accuracy of less than 95% with some  
334 sequences aligning over less than 50% of the read length even after chopSeq correction and size  
335 selection. These poor-quality reads could not be selectively filtered out based on any commonly  
336 used quality filtering criteria (e.g., maximum homopolymers length, primer mismatches, etc.) and  
337 significantly affected clustering of reads into OTUs. For instance, VSEARCH based clustering of  
338 full length post chopSeq and size selected reads (INC-Seq aligner: blastn) at a 97% sequence  
339 similarity threshold resulted in 817 (with 777 singletons) and 1301 (with 1238 singletons) for 2D  
340 and 1D2 data for single organism experiment and 2122 (with 1742 singletons) and 2725 (with  
341 2447 singletons) for 2D and 1D2 data for 10 organism experiments. We hypothesized that accrual  
342 of residual errors over the entire read length hampered the accuracy of the OTU clustering and that  
343 accurate clustering was more likely over shorter regions of the reads due to fewer absolute errors.  
344 To this end, we developed nanoClust which utilizes partitioning of reads in user-defined lengths,  
345 followed by application of VSEARCH within each partition for dereplication, singleton removal,  
346 chimera detection and removal, clustering at user-defined sequence similarity threshold (i.e., 97%  
347 sequence similarity in this study), followed by within cluster sequence clustering and consensus  
348 calling.

349

350 We tested the effect of the choice of partition length on the estimation of the richness of the mock  
351 communities (i.e., number of observed OTUs) and overall sequence accuracy post within-OTU

352 MAFFT-G-INS-i alignment and consensus sequence construction. To this effect, we varied the  
 353 number of partitions from one (i.e., partition length of 1300 bp) to seven (i.e., partition length 180  
 354 bp). With increasing number of partitions (i.e., decreasing partition length), the number of OTUs  
 355 being detected were significantly inflated above the theoretical threshold while at the same time  
 356 the average sequence accuracy decreased (Figure 7).

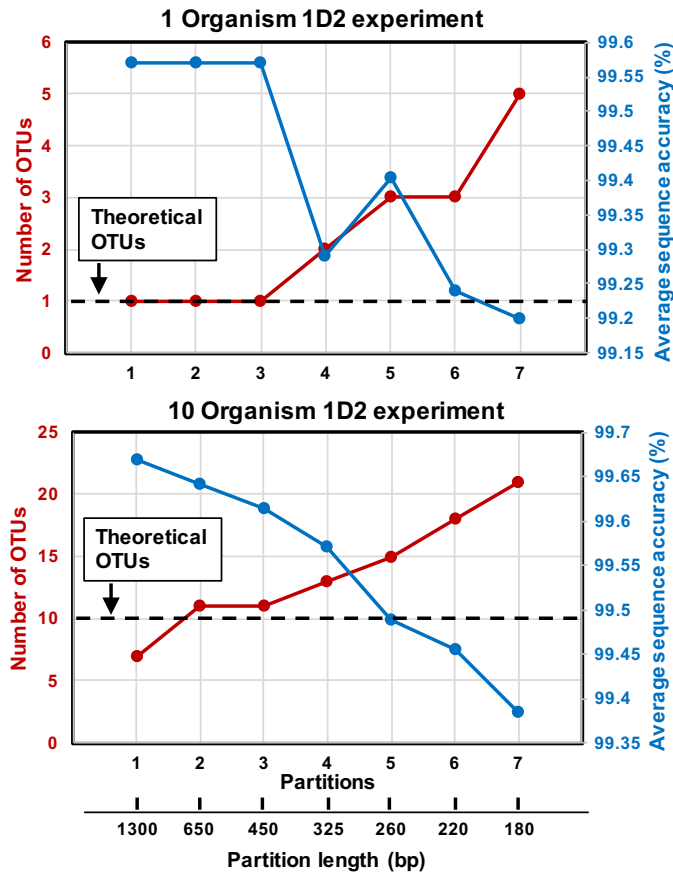

**Figure 7:** Increasing the number of partitions (and decreasing partition length) during nanoClust processing results in inflation in the number of OTUs observed and a decrease in overall sequence accuracy.

357

358 This was consistent for both the one organism and 10 organism experiments for both 1D2 and 2D  
 359 experiments (Figure 7). As the partition size decreased the number of OTUs decreased and the  
 360 overall sequence accuracy increased. The highest average sequence was observed with a single  
 361 partition, but the number of OTUs was lower than theoretical for the 10-organism experiment.

362 Further, using a single partition approach also resulted in discarding a significant number of  
363 sequences that were deemed singletons prior to OTU clustering. Specifically, while three less  
364 OTUs were detected in the single partition approach the total number of sequences retained post  
365 clustering were 20% lower as compared to when two or three partition approach was used.  
366 Considering the tradeoff between sequencing depth (and the resultant impact on detection of lower  
367 abundance OTUs), the extent of deviation from the theoretical number of OTUs and overall  
368 sequence accuracy, we recommend using either the two or three partition approach which result in  
369 similar outcomes on all three metrics.

370  
371 **Table 2:** Number of OTUs detected and consensus sequence accuracy for all experiments using the  
372 nanoClust for OTU clustering and consensus calling approach.

| Protocol        | Number of OTUs |              |              |              | Average Consensus Accuracy (%) |              |              |              |
|-----------------|----------------|--------------|--------------|--------------|--------------------------------|--------------|--------------|--------------|
|                 | 2D             | 1D2          | 2D           | 1D2          | 2D                             | 1D2          | 2D           | 1D2          |
| Experiment      | One organism   | One organism | Ten organism | Ten organism | One organism                   | One organism | Ten organism | Ten organism |
| Run             | 1              | 4            | 2            | 3            | 1                              | 4            | 2            | 3            |
| Theoretical     | 1              | 1            | 10           | 10           |                                |              |              |              |
| INC-Seq aligner | Blastn         |              |              |              |                                |              |              |              |
| OTUs detected   | 1              | 1            | 11           | 11           | 99.36                          | 99.5         | 99.47        | 99.61        |
| Spurious OTUs   | 0              | 0            | 1            | 1            | -                              | -            | 99.22        | 99.37        |
| Non-Detect      | 0              | 0            | 0            | 0            | -                              | -            | -            | -            |
| INC-Seq aligner | Graphmap       |              |              |              |                                |              |              |              |
| OTUs detected   | 1              | 1            | 11           | 11           | 99.43                          | 99.43        | 99.44        | 99.61        |
| Spurious OTUs   | 0              | 0            | 1            | 1            | -                              | -            | 99.29        | 99.5         |
| Non-Detect      | 0              | 0            | 0            | 0            | -                              | -            | -            | -            |
| INC-Seq aligner | POA            |              |              |              |                                |              |              |              |
| OTUs detected   | 1              | 2            | 10           | 12           | 99.5                           | 99.61        | 99.60        | 99.52        |
| Spurious OTUs   | 0              | 1            | 0            | 2            | -                              | 99.57        | -            | 98.67        |
| Non-Detect      | 0              | 0            | 0            | 0            | -                              | -            | -            | -            |

373  
374 The nanoClust approach with three partitions was far superior to the direct clustering of full-length  
375 reads and resulted in an accurate determination of the number of OTUs, with one-two spurious  
376 OTUs (when using 3 concatemers threshold for INC-Seq) and no false negatives (Table 2)  
377 depending on the type of experiment and INC-Seq aligner used. MAFFT-G-INS-i alignment of

378 50 reads from each OTU resulted in consensus reads with the entire read aligned to the reference,  
379 and average consensus read of 99.5% and accuracy values for individual OTUs ranging from 99.2  
380 to 100%. Nearly all errors in the nanoClust consensus reads originate from single base pair  
381 deletions in a few homopolymers regions (homopolymers > 4 bp) and no detectable insertions,  
382 with one-two mismatches associated with the spurious OTUs (Figure 8). While accurate OTU  
383 estimation allowed for single OTUs to be detected in the one organism experiment, the overall  
384 community structure deviated from the theoretical community structure for the ten organism  
385 experiments (Figure S4) and thus additional protocol optimization is essential to ensure levels of  
386 deviation from theoretical community structure does not exceed what may be seen from PCR  
387 biases [33]. Phylogenetic analyses of the consensus sequences demonstrated close placement of  
388 the OTU consensus sequences with their corresponding references, with excellent pairwise  
389 alignment between the two (Supplementary Figure S3).

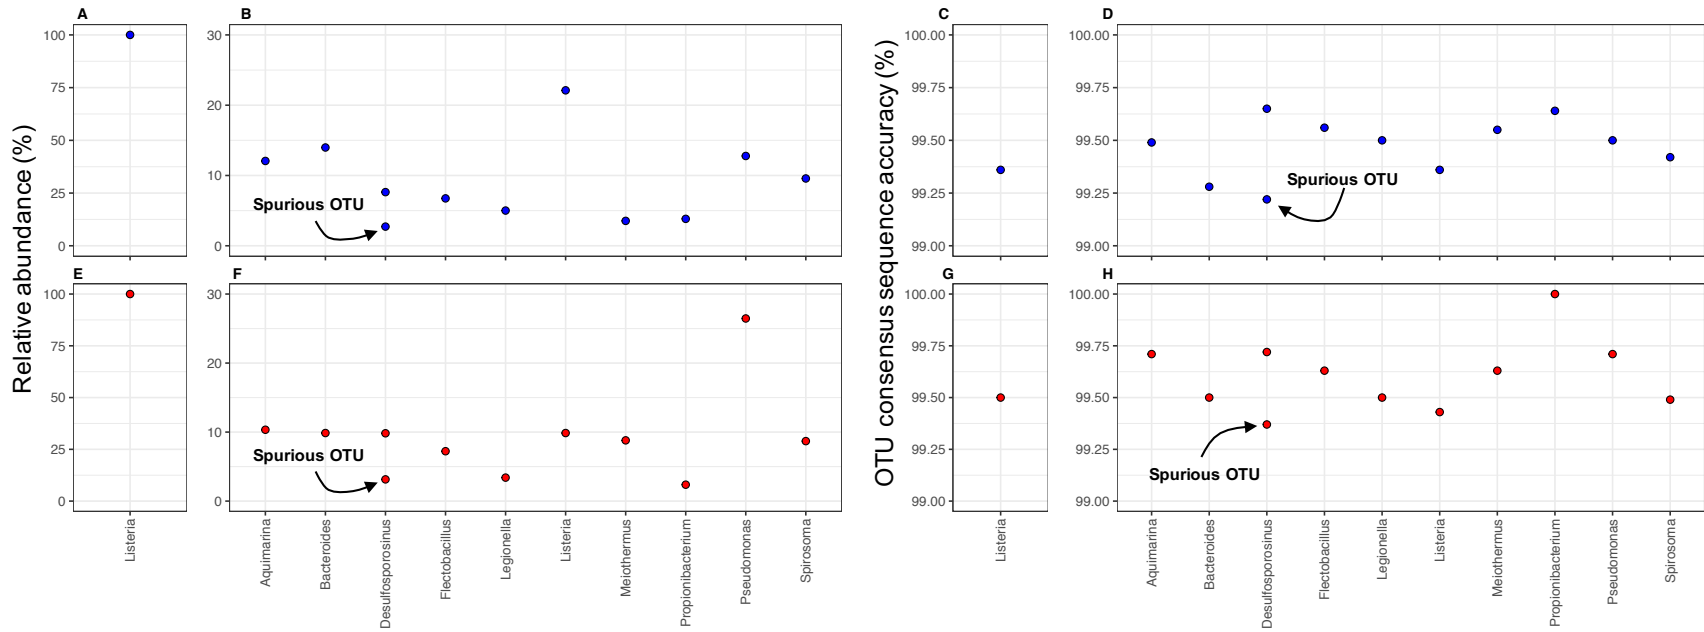

390

391 **Figure 8:** Relative abundance of OTUs for one (A, E) and ten organism experiments (B, F) for 2D (blue data points) and 1D2 (red data points) experiments post nanoClust when  
 392 using blastn algorithm during INC-Seq. nanoClust clustering and consensus sequence generation resulted in few spurious OTUs and average similarity to the reference sequence  
 393 of ~ 99.5%. Results are shown for one (C, G) and ten organism experiments (D, H) for 2D (blue data points) and 1D2 (red data points) experiments with the use of blastn during  
 394 INC-Seq. The results were similar for Graphmap and POA alignment methods used during INC-Seq.



395 The nanoClust implementation in this study included a specified threshold of a maximum of 50  
396 reads per OTU to generate OTU consensus sequences. This was feasible because our study  
397 focusses on a single organism and even mock community of ten organisms. Thus, the process of  
398 consensus construction was not limited by the number of reads that could be recruited. However,  
399 it would be critical to determine the potential for poor quality consensus sequence due to fewer  
400 reads with an OTU in naturally derived mixed microbial communities. To this end, we varied the  
401 number of reads used for consensus sequence construction from 5 to 100 for 2D and 1D2 data  
402 from the one organism experiment (Figure 9).

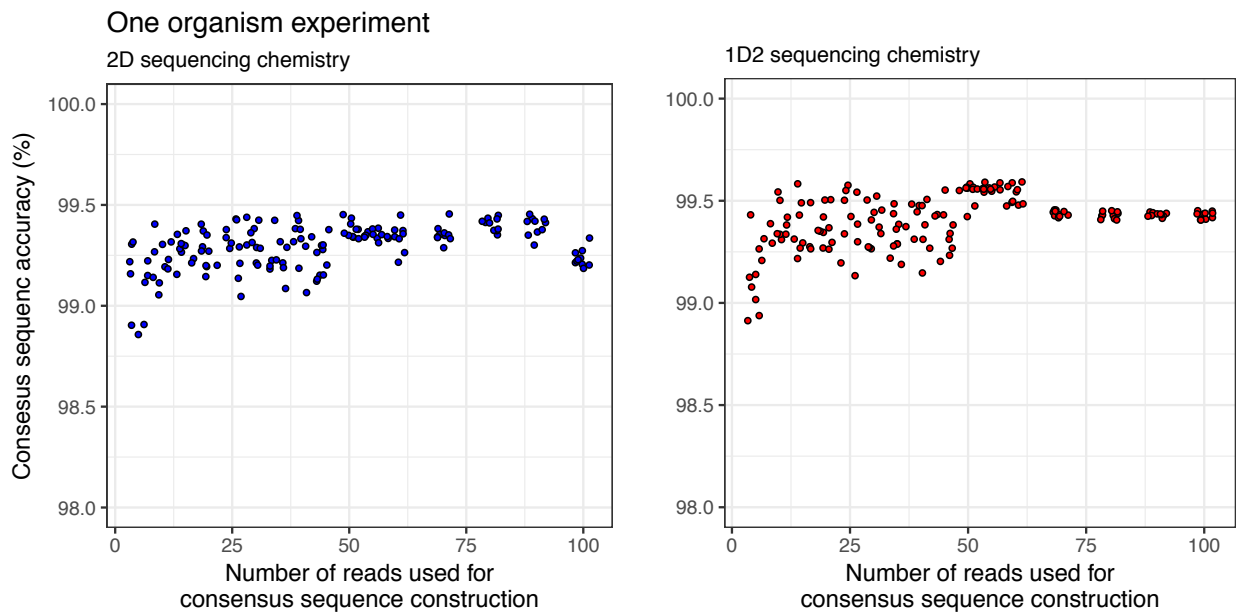

403

404 **Figure 9:** Consensus sequence accuracy plateaus with the use of 10-15 reads for MAFFT-G-INS-i alignment and consensus  
405 calling. However, with increasing number of reads used for consensus calling the variability in consensus sequence accuracy from  
406 repeated sampling of data diminishes significantly for both 2D and 1D2 sequencing chemistry. Data is shown for one organism  
407 experiment where the blastn aligner was used during INC-Seq.

408 The consensus sequence accuracy surpasses 99% with the use of more than five reads for  
409 consensus sequence construction and plateaus at approximately 10-15 reads. However, the  
410 variability in accuracy with repeated random sampling of data was much more pronounced when  
411 fewer than 50 reads were used for both 2D and 1D2 data. This suggests that consensus sequence

412 accuracy is reliably high only for OTUs where a minimum of 50 reads are available for use in  
413 constructing the consensus sequence. This would have an impact on sequence quality of low  
414 abundance OTUs.

415

416 **NanoAmpli-Seq based improvements in sequence accuracy are not primarily associated with**  
417 **changes in nanopore sequencing chemistry.** The INC-Seq study [21] utilized data generated  
418 from flow cells with R7 pores, while the present study used R9.4 and 9.5 pores with reported  
419 higher sequencing accuracy. Improvements in sequencing chemistry and basecalling allowed us  
420 to reduce the concatemer threshold for INC-Seq from six to three, which significantly increased  
421 the amount of data used for analysis. The second significant improvement of the updated  
422 sequencing chemistry is the much higher sequencing output. However, neither of these  
423 improvements result in improved data quality post INC-Seq processing alone (Figure 5). Thus, the  
424 chopSeq and nanoClust algorithms are critical for obtaining 99.5% sequence accuracy.

425

426 To demonstrate this, we re-processed the “Ladder replicate” data made available through the  
427 original INC-Seq study [21] using the NanoAmpli-Seq workflow. While re-analyzing R7  
428 chemistry generated data from Li et al [21], we detected tandem repeats and incorrect primer  
429 orientation issue highlighted in this study. chopSeq was successfully able to remove tandem  
430 repeats and re-orient reads such that nearly the entire length of the read was now correctly aligned  
431 to the reference sequence for most of the reads. Thus, while INC-Seq reaches a median sequence  
432 accuracy of 97-98% (as described in the Li et al. [21]), post-processing by chopSeq improves read  
433 quality through read re-orientation and tandem repeat removal (Figure 10).

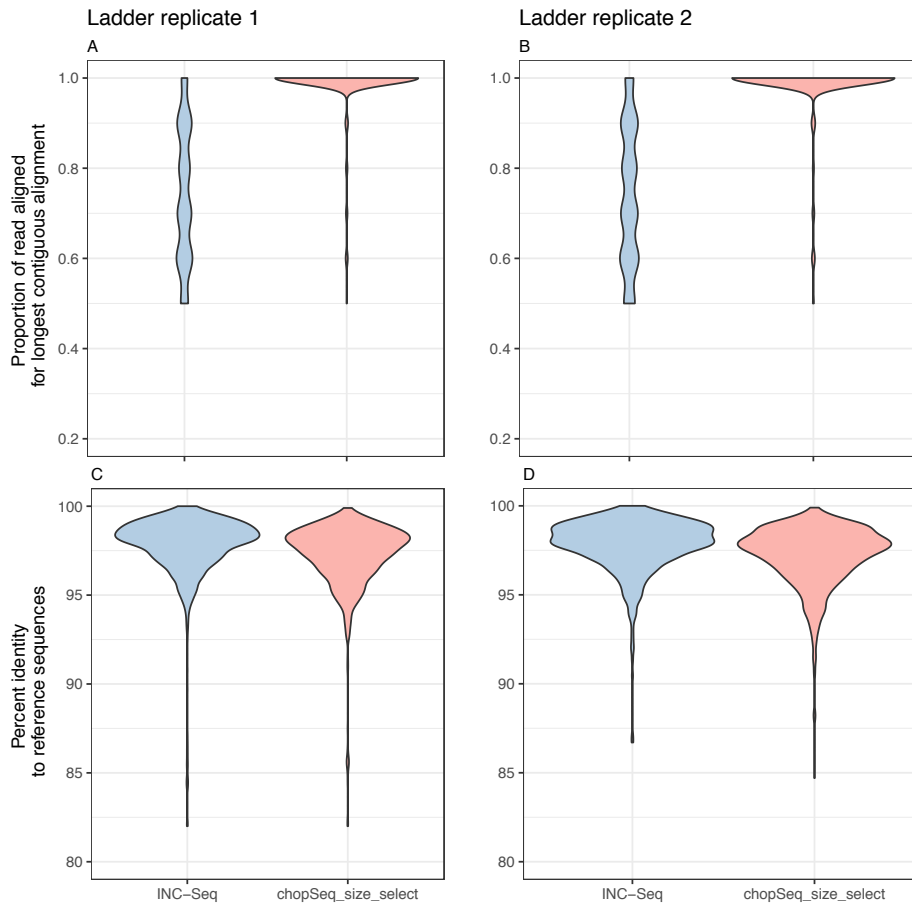

**Figure 10:** chopSeq based read re-orientation and tandem repeat removal allowed for nearly the entire length of the read to be aligned to the reference sequences (A, B) while maintaining the median sequence accuracy of INC-Seq consensus reads to ~97-98%.

450 Furthermore, nanoClust based clustering and consensus calling results in an average sequence  
 451 accuracy of 99.5% for the data generated by Li et al [21]. The data generated by Li et al. [21]  
 452 included the V3-V6 region of the 16S rRNA gene from 10-organism mock community with a  
 453 staggered community structure including closely related organisms. This resulted in a theoretical  
 454 number of 8 OTUs at 97% sequence similarity. Specifically, *Staphylococcus aureus* and  
 455 *Staphylococcus epidermis* clustered into a single OTU at 97% sequence similarity (their 16S rRNA  
 456 gene V3-V6 hypervariable regions are 98.8% similar to each other) and *Klebsiella pneumoniae*

457 and *Salmonella typhimurium* clustered into a single OTU at 97% sequence similarity (their 16S  
 458 rRNA gene V3-V6 hypervariable regions are 97.6 % similar to each other). Further, the Li et al.  
 459 [21] only generated 2100 INC-Seq consensus reads combined for the two replicate sequencing  
 460 runs. As a result, two of the low abundance OTUs with a relative abundance of 0.2% (*Neisseria*),  
 461 and 0.1% (*Faecalibacterium*) were not detected after processing with chopSeq and nanoClust. This  
 462 non-detection of low abundance OTUs is primarily a function of low sequencing depth rather than  
 463 of the NanoAmpli-Seq workflow. Further, the sequence accuracy of most of the detected OTUs  
 464 was in excess of 99.5%, while that of a single OTU (i.e., *Fusobacterium*) was 98.75% (Figure 11).  
 465 Thus, we conclude that incorporating chopSeq correction of INC-Seq consensus reads followed  
 466 by nanoClust based clustering and consensus calling was vital for improved sequence accuracy,  
 467 irrespective of the changes in the sequencing chemistry.

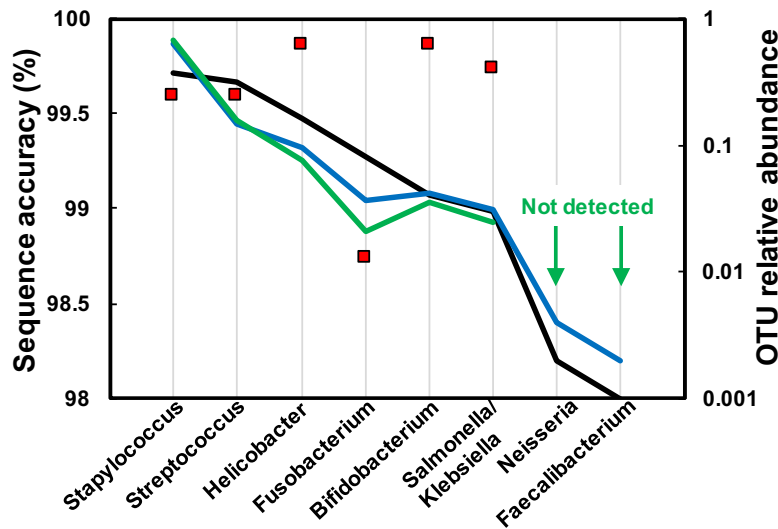

**Figure 11:** Sequence accuracy of detected OTUs post nanoClust for combined ladder replicate was ~99.5% (red squares). Two OTUs were not detected post nanoClust processing (green line) due to their low abundance (<0.5%) in the constructed mock community (black line). The blue line shows the relative abundance as reported by Li et al.

468

469

470

471 **Discussion and conclusions**

472 The current study uses mock communities to develop and validate the NanoAmpli-Seq workflow  
473 for long amplicon sequencing on the nanopore sequencing platform. While this study focusses on  
474 the near full-length 16S rRNA gene, in principle the approach outlined by the NanoAmpli-Seq  
475 workflow should be amenable to amplicons generated from PCR amplification of any target gene  
476 irrespective of target gene length. While leveraging the previously described INC-Seq protocol,  
477 NanoAmpli-Seq adds several novel components which significantly enhances the amplicon  
478 sequencing workflow for the nanopore platform. The improvements over the previously described  
479 INC-Seq protocol involve modifications to both library preparation (i.e. PrimPol based primer  
480 synthesis for RCA, debranching and fragmentation, shorter protocol length) and the data analyses.  
481 Specifically, we identify and fix the issues associated with incorrect read-orientation and presence  
482 of tandem repeats in INC-Seq consensus reads, thus allowing for nearly the entire length of the  
483 chopSeq corrected reads to be aligned to the reference with accuracies (97-98%) similar to those  
484 described by Li et al [21]. While the original INC-Seq protocol prescribed a concatemer threshold  
485 of six, we halved the concatemer threshold to three. Thus, more than doubling the number of INC-  
486 Seq consensus reads available as a proportion of the base called reads. We could use a lower INC-  
487 Seq concatemer threshold due to both enhances in basecalling and sequencing accuracy of the  
488 nanopore platform [34]and the ability to perform another round of alignment and consensus calling  
489 during the nanoClust step.

490

491 The correction of INC-Seq consensus reads using chopSeq did not allow for sequences with high  
492 enough quality for direct OTU clustering using VSEARCH. However, the read partitioning-based  
493 sequence clustering allowed for accurate determination of the number of OTUs in the mock

494 community. Further, *de novo* sequence clustering using nanoClust provided the opportunity to  
495 significantly increase the number of sequences used for consensus calling. In this study, we used  
496 50 reads for consensus calling (i.e. 150x coverage considering three concatemer threshold set for  
497 INC-Seq) which resulted in average sequence accuracy of 99.5%. The use of more than 50 reads  
498 for consensus calling in nanoClust did not improve sequence accuracy while reducing the number  
499 of reads resulted in reduced precision. This threshold of 50 reads for both the 2D and 1D2  
500 sequencing data suggests that the OTUs with fewer than 50 reads are likely to have sequence  
501 quality lower than those OTUs with greater than 50 reads. It should however be noted that using a  
502 10 read threshold (i.e., 30x coverage when including three concatemer threshold for INC-Seq)  
503 consistently allowed for sequence accuracy consistently higher than 99% and thus sequence  
504 classification to species level using any of the current sequence classification approaches [35, 36]  
505 (i.e., RDP classifier) would be reliable even for lower abundance OTUs.

506

507 While the NanoAmpli-Seq workflow represents a significant improvement in amplicon  
508 sequencing on the nanopore platform, some fundamental limitations remain. For instance, the  
509 NanoAmpli-Seq sequence accuracy is still lower than those reported for short amplicons [3] or  
510 those generated from the assembly of SSU rRNA from metagenomic sequencing on the Illumina  
511 Platform [7, 9] and the full-length 16S rRNA sequencing on the PacBio platform using the  
512 approach described previously [17]. Our analysis shows that the sequence accuracy does not  
513 improve with more than 50 sequences used in the nanoClust based consensus calling process.  
514 Nearly all the errors in the OTU consensus sequences originate from single deletions at  
515 homopolymers regions, specifically for homopolymers greater than 4 bp. This homopolymer error  
516 issue on the nanopore platform is well known [14, 37] and is likely to best resolved during the base

517 calling process rather than subsequent data processing or by processing signal data (rather than  
518 base called data) all the way through clustering, followed by base calling as the final step. The  
519 second limitation of our approach is the low data yield at the base calling step, i.e. base called  
520 reads represents only a small portion (i.e., 7-9% for 1D2 data) of the raw records. This data loss is  
521 significant and could potentially deter the widespread use of the nanopore platform for amplicon  
522 sequencing. While the precise cause of the low yield of pass reads post base calling is unclear, the  
523 proportion of pass reads in our study are not significantly different from those reported elsewhere.  
524 One current option would be to directly work with 1D rather than 1D2 data. However, the  
525 maximum sequence accuracy of 1D reads post INC-Seq consensus construction was only 94% and  
526 unsuitable for processing with chopSeq and nanoClust. The NanoAmpli-Seq workflow includes a  
527 *de novo* clustering step, and as long as the sequence accuracy post chopSeq is ~97% (3-10  
528 concatemers required), the binning process should provide for sufficient coverage for consensus-  
529 based sequence correction to accuracies in excess of 99%. The final limitation of our approach is  
530 that the nanoClust relies on generating consensus sequences from multiple DNA sequences and  
531 thus there is the likelihood of clustering and generating a multi-species consensus from closely  
532 related species, i.e. those within 97% sequence similarity to each other. While we did not find  
533 evidence for this “multispecies consensus sequence” while analyzing data from Li et al. [21] which  
534 included closely related organisms, this possibility cannot be ignored. And thus, we recommend  
535 that researchers refrain from depositing NanoAmpli-Seq processed sequences in publicly available  
536 references databases, but utilize this approach for rapid screening of mixed microbial communities  
537 and limit the use of NanoAmpli-Seq processed data for within-study sample microbial community  
538 comparisons. Future improvement to avoid the likelihood of “multispecies consensus sequence”  
539 would be to utilize primers with barcodes consisting of random N bases (i.e., unique molecular

540 tags), similar to that used by Karst et al. This could allow clustering of reads originating from the  
541 same original sequence using the unique molecular tags.

542

## 543 **Methods**

### 544 Mock community description and preparation

545 Two different mock communities were constructed for the experiments outlined in this study. First,  
546 a single organism mock community was constructed by amplifying the near full-length of the 16S  
547 rRNA gene from genomic DNA of *Listeria monocytogens* using primers sets 8F (5'-  
548 AGRGTTTGATCMTGGCTCAG-3') and 1387R (5'-GGGCGGWGTGTACAAG-3'), both with  
549 5' phosphorylated primers (Eurofins Genomics)<sup>26</sup>. Phosphorylated ends are essential for the  
550 subsequent self-ligation step. PCR reaction mix was prepared in 25µl volumes with use of 12.5µl  
551 of Q5® High-Fidelity 2X Master Mix (New England BioLabs Inc., M0492L), 0.8µl of 10pmol of  
552 each primer, 9.9µl of nuclease-free water, (Roche Ltd.) and 1ng of bacterial DNA in total followed  
553 by PCR amplification as described previously<sup>26</sup>. PCR amplicons from replicate PCR reactions  
554 were combined and purified with use of HighPrep™ PCR magnetic beads (MagBio, AC-60050)  
555 at 0.45x ratio. The ten organism mock community was constructed from purified near full-length  
556 16S rRNA amplicons of 10 organisms. Briefly, genomic DNA from 10 bacteria were obtained  
557 from DSMZ, Germany (Supplementary Table S1) and the aforementioned primers, PCR reaction  
558 mix and thermocycling conditions were used to independently PCR amplify the near full-length  
559 16S rRNA gene, followed by purification using HighPrep™ PCR magnetic beads as detailed  
560 above. The purified amplicons from each organism were quantified on the Qubit using dsDNA HS  
561 kit, normalized to 4ng/µl, and combined to generate an amplicon pool consisting of an equimolar  
562 proportion of the 16S rRNA gene amplicons of the 10 organisms.



563 DNA sequencing library preparation.

564 To circularize the linear amplicons into plasmid-like structures, 5 $\mu$ l of Blunt/TA Ligase Master  
565 Mix (New England Biolabs, M0367L) was added to 55  $\mu$ l of amplicon pool at a concentration of  
566 1ng/ $\mu$ l and incubated for 10min at 15°C then 10min at room temperature to (total time = 20  
567 minutes). Not all linear amplicons self-ligate into plasmid-like structures, but some are likely to  
568 cause long chimeric linear amplicons. These long chimeric structures were removed using  
569 magnetic bead-based purification with the following modifications. HighPrep™ PCR magnetic  
570 beads were homogenized by vortexing followed by aliquoting 50 $\mu$ l into a sterile 2ml tube and  
571 placed on a magnetic rack for 3min. A total of 25 $\mu$ l of the supernatant was carefully removed using  
572 a sterile pipette to concentrate the beads to 2x its original concentration. The tube was removed  
573 from the magnetic rack and vortexed vigorously to resuspend the beads. This concentrated bead  
574 solution was used at a ratio of 0.35x to remove any amplicons greater than 2000 bp in the post-  
575 ligation reaction mix. Briefly, the post-ligation product was mixed with concentrated bead solution  
576 at the 0.35x ratio by vortexing followed by incubation for three minutes at room temperature. The  
577 tube was placed on the magnetic rack to separate the beads from solution, followed by transferring  
578 of clear liquid containing DNA structures less than 2000 bp into new sterile tubes. Sample  
579 containing short self-ligated molecules was subject to another round of concentration using  
580 standard magnetic beads at 0.5x ratios according to manufacturer instructions and eluted in 15 $\mu$ l  
581 of warm nuclease-free water. Concentrated and cleaned DNA pool consisting of plasmid-like  
582 structures and remaining linear amplicons was then processed with Plasmid-Safe™ ATP-  
583 Dependent DNase (Epicentre, E3101K) reagents to digest linear amplicons using the mini-prep  
584 protocol according to manufacturer instructions and was followed by another round of cleanup

585 with magnetic beads at 0.45x ratio as described before and then eluted in 15µl of warm nuclease-  
586 free water.

587

588 The pool containing plasmid-like structures was subject to RCA with use of TruPrime™ RCA Kit  
589 (Sygnis, 390100) random hexamer-free protocol. Samples were prepared in triplicate and  
590 processed according to manufacturer protocol with all incubations performed in triplicate for 120-  
591 150 min depending on the assay efficiency. The progress of RCA was monitored by measuring the  
592 concentration of DNA using Qubit® 2.0 Fluorometer at 90, 120 or 150 min time points. The  
593 negative control sample, consisting of reagents without any circularized plasmid-like amplicons,  
594 were processed and analyzed concomitantly with the samples. The final concentration of the RCA  
595 product after 150 minutes of incubation was typically 70 ng/µl when using a starting DNA  
596 concentration of 0.35-0.4 ng/µl with no detectable unspecific product formation in the negative  
597 control.

598

599 Replicates RCA products were combined (~4.5µg of DNA in total) and subject to de-branching  
600 and fragmentation of post-RCA molecules to remove hyperbranching structures generated during  
601 RCA. The RCA product was first treated with T7 endonuclease I enzyme (New England BioLabs,  
602 M0302S) by adding 2µl of the reagent to the 65µl of RCA product followed by vortexing and  
603 incubation as recommended by the manufacturer. Subsequently, the reaction mix was transferred  
604 into a g-TUBE (Covaris, 520079) and centrifuged at 1800 rpm for 4min or until the entire reaction  
605 mix passed through the fragmentation hole. The g-TUBE was reversed, and centrifugation process  
606 was repeated. Post debranching and fragmentation, short fragments were removed using the  
607 modified bead-based cleanup step using concentrated bead solution (see above for concentration

608 procedure). Concentrated beads were mixed with fragmented RCA product at a 0.35x ratio,  
609 vortexed for 15sec, and incubated at room temperature for 3min then placed on a magnetic rack  
610 until the beads separated and the supernatant was removed. The beads were subsequently washed  
611 with 70% freshly prepared ethanol according to manufacturer protocols. Size-selected amplicons  
612 bound to the beads were eluted in 41µl of warm nuclease-free water. Preliminary experiments  
613 indicated that one round of de-branching did not completely resolve the hyperbranching structure,  
614 which was inferred based on poor sequencing yield likely caused due to pore blocking by  
615 hyperbranched DNA. As a result, a second round of enzymatic de-branching using T7  
616 endonuclease I was added and the de-branched product was cleaned a second time using the bead-  
617 based clean-up step. Figure S4 shows an example BioAnalyzer traces of the RCA product post-  
618 debranching/fragmentation and post-cleanup using magnetic bead-based protocol.

619

620 Finally, the de-branched RCA product was treated with NEBNext® FFPE DNA Repair Mix (New  
621 England BioLabs, M6630S) for gap filling and DNA damage repair caused during g-TUBE  
622 fragmentation and T7 endonuclease I enzyme. All reagent components were combined with de-  
623 branched RCA product according to manufacturer recommendations and incubated at 12°C for  
624 10min then at 20°C for another 10min. Post incubation, the repaired RCA product was cleaned  
625 using standard magnetic beads at 0.5x ratio, washed with 70% ethanol, and eluted in 46µl of warm  
626 nuclease-free water. The concentration of the DNA product was measured using Qubit and was  
627 approximately 20-25 ng/µl with a total yield of ~1000 ng of DNA with product size typically  
628 ranging from 1500bp to 20,000 bp. A total of 45µl DNA pool of concatamerized amplicons was  
629 prepared for sequencing using the standard 2D and 1D2 library preparation protocol by Oxford  
630 Nanopore Technologies (SQK-LSK208, SQK-LSK308) according to manufacturer specifications

631 to obtain pre-sequencing mix. Moreover, the final concentration for prepared libraries was  
632 determined using dsDNA HS kit on the Qubit instrument. A detailed step-by-step protocol is  
633 provided in the supplementary text.

634

#### 635 DNA sequencing.

636 The MinION Mk1B was connected to Windows personal computer compatible with Oxford  
637 Nanopore Technologies requirements. R9.4 (FLO-MIN106) and R9.5 (FLO-MIN107) flow cells  
638 were placed onto the MinION Mk1B (Oxford Nanopore Technologies). Platform quality control  
639 was performed using MinKNOW software (v1.4.2 for 2D and v1.6.11 for 1D2 libraries). Only  
640 flow cells containing above 1100 active pores were used in this study. Each flow cell was primed  
641 twice according to ONT specifications using priming buffer consisting of equal parts of running  
642 buffer (RBF1) and nuclease-free water with 10 min breaks between subsequent primes. The  
643 loading mix was prepared with a 12 $\mu$ L pre-sequencing mix, 75 $\mu$ L of RBF1, and 63 $\mu$ L of nuclease-  
644 free water. Loading mix was sequenced with MinKNOW settings appropriate for 2D or 1D2  
645 options and standard 48h processing time for every run. Albacore 1.2.4 was used to convert raw  
646 signals into HDF5 file format using switch options FLO-MIN106 and SQK-LSK208 for 2D data  
647 and FLO-MIN107 and SQK-LSK308 for 1D2 data.

648

#### 649 Data processing

650 HDF5 raw signals from each sequencing run were converted to FASTQ format using Fast5-to-  
651 Fastq (<https://github.com/rrwick/Fast5-to-Fastq>) and then from FASTQ to FASTA with seqtk  
652 (<https://github.com/lh3/seqtk>). The resultant data was subject to INC-Seq  
653 (<https://github.com/CSB5/INC-Seq>) processing using blastn, Graphmap, and POA aligners with

654 concatemer threshold of 3 with the iterative flag for consensus error correction using  
655 PBDAGCON. INC-Seq consensus reads were subject to chopSeq by specifying forward and  
656 reverse primer sequences and upper (1450 bp) and lower (1300 bp) read size thresholds for size  
657 selection (chopSeq\_SS). The chopSeq processed reads were subsequently processed using  
658 nanoClust with partition size limits (flag “-s”) of 0,450,451,900,901,1300 which splits the reads  
659 into three partitions of 450, 450, and 400 bp respectively prior to further processing. VSEARCH  
660 was used for chimera removal (using uchime) followed by clustering of reads in each partition at  
661 a hardcoded sequence similarity threshold of 97%. For the optimal binning results, nanoClust then  
662 outputs consensus sequence for each OTU based on MAFFT-G-INS-i pairwise alignment as  
663 described previously and outputs an OTU table with reads corresponding to each OTU after  
664 discarding singletons.

665

666 Fasta files from all stages (i.e. raw, INC-Seq, chopSeq, chopSeq\_SS, and OTU consensus  
667 sequence) were analyzed for read lengths in R [38]. The number of concatemers on each raw read  
668 was estimated by dividing the length of each raw read with the length of its corresponding INC-  
669 Seq consensus read. At each stage of processing, the reads were aligned to reference dataset using  
670 blastn, and only the match with the highest bitscore was considered. The ratio of read to reference  
671 alignment at appropriate points (as discussed above) was estimated based on blastn results. The  
672 percent identity from the blastn results were used to measure consensus sequence accuracy for the  
673 nanoClust output. All figures for the manuscript were generated in R using packages “ggplot2”,  
674 “gridExtra”, and “cowplot” (<https://github.com/wilkelab/cowplot>), as appropriate. Neighbor-  
675 Joining tree construction (Figure S3 and S4) was performed after muscle alignment [39] (default

676 parameters) and using Jukes-Cantor model was constructed in Geneious (version 8) using 100  
677 bootstraps.

678

### 679 **Availability and requirements**

680 Project name: NanoAmpli-Seq

681 Project home page: <https://github.com/umerijaz/nanopore>

682 Operating system: Linux

683 Programming language: Python

684

### 685 **Availability of supporting data**

686 All data is available on European Nucleotide Archive (ENA) under primary accession number:  
687 PRJEB21005.

688

### 689 **Abbreviations:**

690 ONT, Oxford Nanopore Technologies; RCA, Rolling circle amplification; SMRT, single  
691 molecular real-time; INC-Seq, Intramolecular-ligated Nanopore Consensus Sequencing

692

### 693 **Declarations**

694 **Acknowledgements:** This research was supported by EPSRC award no: EP/M016811/1. STC is  
695 supported by the EPSRC Doctoral Training Center at University of Glasgow. UZI is supported by  
696 a NERC Fellowship (NE/L011956/1).

697

698 **Author contribution:** STC, UZI, and AJP designed and developed the experiments. STC  
699 performed the experiments. UZI wrote the code for chopSeq and nanoClust. STC, UZI, and AJP  
700 analyzed the data and contributed equally to writing this manuscript.

701

## 702 **References**

- 703 1. Caporaso JG, Lauber CL, Walters WA, Berg-Lyons D, Huntley J and Fierer N. Ultra-  
704 high-throughput microbial community analysis on the Illumina HiSeq and MiSeq  
705 platforms. *ISME J.* 2012;6 doi:10.1038/ismej.2012.8.
- 706 2. Caporaso JG, Lauber CL, Walters WA, Berg-Lyons D, Lozupone CA, Turnbaugh PJ, et  
707 al. Global patterns of 16S rRNA diversity at a depth of millions of sequences per sample.  
708 *Proceedings of the National Academy of Sciences.* 2011;108 Supplement 1:4516-22.  
709 doi:10.1073/pnas.1000080107.
- 710 3. Kozich JJ, Westcott SL, Baxter NT, Highlander SK and Schloss PD. Development of a  
711 dual-index sequencing strategy and curation pipeline for analyzing amplicon sequence  
712 data on the MiSeq Illumina sequencing platform. *Appl Environ Microbiol.* 2013;79  
713 doi:10.1128/aem.01043-13.
- 714 4. Schoch CL, Seifert KA, Huhndorf S, Robert V, Spouge JL, Levesque CA, et al. Nuclear  
715 ribosomal internal transcribed spacer (ITS) region as a universal DNA barcode marker  
716 for Fungi. *Proceedings of the National Academy of Sciences.* 2012;109 16:6241-6.  
717 doi:10.1073/pnas.1117018109.
- 718 5. Goodwin S, McPherson JD and McCombie WR. Coming of age: ten years of next-  
719 generation sequencing technologies. *Nat Rev Genet.* 2016;17 6:333-51.  
720 doi:10.1038/nrg.2016.49.
- 721 6. Yuan C, Lei J, Cole J and Sun Y. Reconstructing 16S rRNA genes in metagenomic data.  
722 1367-4811 (Electronic) doi:10.1093/bioinformatics/btv231.
- 723 7. Miller C, Baker B, Thomas B, Singer S and Banfield J. EMIRGE: reconstruction of full-  
724 length ribosomal genes from microbial community short read sequencing data. *Genome*  
725 *Biology.* 2011;12 5:R44.
- 726 8. Burke CA-O and Darling AE. A method for high precision sequencing of near full-length  
727 16S rRNA genes on an Illumina MiSeq. 2167-8359 (Print).
- 728 9. Miller CS, Handley KM, Wrighton KC, Frischkorn KR, Thomas BC and Banfield JF.  
729 Short-Read Assembly of Full-Length 16S Amplicons Reveals Bacterial Diversity in  
730 Subsurface Sediments. *PLOS ONE.* 2013;8 2:e56018. doi:10.1371/journal.pone.0056018.
- 731 10. Karst SM, Dueholm MS, McIlroy SJ, Kirkegaard RH, Nielsen PH and Albertsen M.  
732 Retrieval of a million high-quality, full-length microbial 16S and 18S rRNA gene  
733 sequences without primer bias. *Nature Biotechnology.* 2018;36:190.  
734 doi:10.1038/nbt.4045.
- 735 11. Mardis ER. DNA sequencing technologies: 2006–2016. *Nature Protocols.* 2017;12:213.  
736 doi:10.1038/nprot.2016.182.
- 737 12. Wommack KE, Bhavsar J and Ravel J. Metagenomics: Read Length Matters. *Applied*  
738 *and Environmental Microbiology.* 2008;74 5:1453-63. doi:10.1128/aem.02181-07.

- 739 13. Koren S, Walenz BP, Berlin K, Miller JR, Bergman NH and Phillippy AM. Canu:  
740 scalable and accurate long-read assembly via adaptive k-mer weighting and repeat  
741 separation. *Genome Research*. 2017;27 5:722-36. doi:10.1101/gr.215087.116.
- 742 14. Loman NJ, Quick J and Simpson JT. A complete bacterial genome assembled de novo  
743 using only nanopore sequencing data. *Nat Methods*. 2015;12 doi:10.1038/nmeth.3444.
- 744 15. Chin C-S, Peluso P, Sedlazeck FJ, Nattestad M, Concepcion GT, Clum A, et al. Phased  
745 diploid genome assembly with single-molecule real-time sequencing. *Nature Methods*.  
746 2016;13:1050. doi:10.1038/nmeth.4035.
- 747 16. Michael TP, Jupe F, Bemm F, Motley ST, Sandoval JP, Loudet O, et al. High contiguity  
748 *Arabidopsis thaliana* genome assembly with a single nanopore flow cell. *bioRxiv*. 2017;  
749 doi:10.1101/149997.
- 750 17. Schloss PD, Jenior ML, Koumpouras CC, Westcott SL and Highlander SK. Sequencing  
751 16S rRNA gene fragments using the PacBio SMRT DNA sequencing system. *PeerJ*.  
752 2016;4:e1869. doi:10.7717/peerj.1869.
- 753 18. Benítez-Páez A, Portune KJ and Sanz Y. Species-level resolution of 16S rRNA gene  
754 amplicons sequenced through the MinION™ portable nanopore sequencer. *GigaScience*.  
755 2016;5 1:4. doi:10.1186/s13742-016-0111-z.
- 756 19. Cusco A, Vines J, D'Andrea S, Riva F, Casellas J, Sanchez A, et al. Using MinION to  
757 characterize dog skin microbiota through full-length 16S rRNA gene sequencing  
758 approach. *bioRxiv*. 2017; doi:10.1101/167015.
- 759 20. Kerkhof LJ, Dillon KP, Häggblom MM and McGuinness LR. Profiling bacterial  
760 communities by MinION sequencing of ribosomal operons. *Microbiome*. 2017;5 1:116.  
761 doi:10.1186/s40168-017-0336-9.
- 762 21. Li C, Chng KR, Boey EJ, Ng AH, Wilm A and Nagarajan N. INC-Seq: accurate single  
763 molecule reads using nanopore sequencing. *GigaScience*. 2016;5:34. doi:D - NLM:  
764 PMC4970289 OTO - NOTNLM.
- 765 22. Benitez-Paez A and Sanz Y. Multi-locus and long amplicon sequencing approach to  
766 study microbial diversity at species level using the MinION portable nanopore sequencer.  
767 *Gigascience*. 2017;6 7:1-12.
- 768 23. Shin J, Lee S, Go M-J, Lee SY, Kim SC, Lee C-H, et al. Analysis of the mouse gut  
769 microbiome using full-length 16S rRNA amplicon sequencing. *Scientific Reports*.  
770 2016;6:29681. doi:10.1038/srep29681.
- 771 24. Mitsuhashi S, Kryukov K, Nakagawa S, Takeuchi JS, Shiraishi Y, Asano K, et al. A  
772 portable system for rapid bacterial composition analysis using a nanopore-based  
773 sequencer and laptop computer. *Scientific Reports*. 2017;7 1:5657. doi:10.1038/s41598-  
774 017-05772-5.
- 775 25. Quast C, Pruesse E, Yilmaz P, Gerken J, Schweer T, Yarza P, et al. The SILVA  
776 ribosomal RNA gene database project: Improved data processing and web-based tools.  
777 *Nucleic Acids Research*. 2013;41:590-6. doi:10.1093/nar/gks1219.
- 778 26. Singer E, Bushnell B, Coleman-Derr D, Bowman B, Bowers RM, Levy A, et al. High-  
779 resolution phylogenetic microbial community profiling. *The ISME Journal*. 2016;10:2020.  
780 doi:10.1038/ismej.2015.249.
- 781 27. Picher AJ, Budeus B, Wafzig O, Krüger C, García-Gómez S, Martínez-Jiménez MI, et al.  
782 TruePrime is a novel method for whole-genome amplification from single cells based on  
783 TthPrimPol. *Nature Communications*. 2016;7:13296. doi:10.1038/ncomms13296.



- 784 28. Rognes T, Flouri T, Nichols B, Quince C and Mahe F. Vsearch: a versatile open source  
785 tool for metagenomics. PeerJ. 2016;4 doi:10.7717/peerj.2584.
- 786 29. Schloss P, Westcott S, Ryabin T, Hall J, Hartmann M, Hollister E, et al. Introducing  
787 mothur: Open Source, Platform-independent, Community-supported Software for  
788 Describing and Comparing Microbial Communities. Appl Environ Microbiol. 2009;  
789 doi:10.1128/AEM.01541-09.
- 790 30. Westcott SL and Schloss PD. De novo clustering methods outperform reference-based  
791 methods for assigning 16S rRNA gene sequences to operational taxonomic units. PeerJ.  
792 2015;3:e1487. doi:10.7717/peerj.1487.
- 793 31. Katoh K, Misawa K, Kuma K-i and Miyata T. MAFFT: a novel method for rapid  
794 multiple sequence alignment based on fast Fourier transform. Nucleic Acids Research.  
795 2002;30 14:3059-66.
- 796 32. Katoh K and Toh H. Recent developments in the MAFFT multiple sequence alignment  
797 program. Briefings in Bioinformatics. 2008;9 4:286-98. doi:10.1093/bib/bbn013.
- 798 33. Pinto AJ and Raskin L. PCR Biases Distort Bacterial and Archaeal Community Structure  
799 in Pyrosequencing Datasets. PLoS ONE. 2012;7 8:e43093.  
800 doi:10.1371/journal.pone.0043093.
- 801 34. Jain M, Olsen HE, Paten B and Akeson M. The Oxford Nanopore MinION: delivery of  
802 nanopore sequencing to the genomics community. Genome Biology. 2016;17 1:239.  
803 doi:10.1186/s13059-016-1103-0.
- 804 35. Wang Q, Garrity G, Tiedje J and Cole J. Naive Bayesian classifier for rapid assignment  
805 of rRNA sequences into the new bacterial taxonomy. Appl Environ Microbiol. 2007;73  
806 16:5261-7. doi:10.1128/AEM.00062-07.
- 807 36. Werner JJ, Koren O, Hugenholtz P, DeSantis TZ, Walters WA, Caporaso JG, et al.  
808 Impact of training sets on classification of high-throughput bacterial 16s rRNA gene  
809 surveys. ISME J. 2012;6 1:94-103. doi:10.1038/ismej.2011.82.
- 810 37. Feng W, Zhao S, Xue D, Song F, Li Z, Chen D, et al. Improving alignment accuracy on  
811 homopolymer regions for semiconductor-based sequencing technologies. BMC  
812 Genomics. 2016;17 7:521. doi:10.1186/s12864-016-2894-9.
- 813 38. RCoreTeam. R: A Language and Environment for Statistical Computing R Foundation  
814 for Statistical Computing, Vienna, Austria, 2014.
- 815 39. Edgar RC. MUSCLE: multiple sequence alignment with high accuracy and high  
816 throughput. Nucleic Acids Research. 2004;32 5:1792-7. doi:10.1093/nar/gkh340.

## **NanoAmpli-Seq: A workflow for amplicon sequencing for mixed microbial communities on the nanopore sequencing platform.**

Szymon T Calus, Umer Z Ijaz, Ameet J Pinto

### **Protocol for sample preparation for NanoAmpli-Seq workflow.**

#### **Consumables required:**

1. Sterile Filtered pipette tips from any vendor
2. 0.2 ml PCR grade tubes from any vendor
3. Wide Bore Filtered pipette tips from any vendor
4. Qubit dsDNA HS Assay kit. Vendor: ThermoFisher Scientific. Catalog number: Q32851.
5. Primers for PCR amplification of 16S rRNA gene with phosphorylated 5' ends can be ordered from any provider:
  - a. Forward primer: 8F: [PHO] AGRGTTTGATCMTGGCTCAG
  - b. Reverse primer: 1387R: [PHO] GGGCGGWGTGTACAAGRC
6. The master mix for PCR amplification: Q5® High-Fidelity 2X Master Mix. New England Biolabs, Inc. Catalog number: M0492S
7. Nuclease-free Water. Vendor: New England Biolabs, Inc. Catalog number: B1500S
8. HighPrep™ PCR paramagnetic bead solution. Vendor: MAGBIO. Catalog number: AC-60050
9. 70% ethanol (prepared from denatured ethanol).
10. Magnetic stand for 1.5 ml tubes. MagStrip Magnet Stand 10. Vendor: MAGBIO. Catalog number: MBMS-10
11. Blunt/TA Ligase Master Mix. Vendor: New England Biolabs, Inc. Catalog number: M0367S
12. DNA LoBind Tubes, 1.5 ml. Vendor: Eppendorf. Catalog number: 003018078
13. Plasmid-Safe™ ATP-Dependent DNase. Vendor: Epicentre. Catalog number: E3101K.
14. TruePrime™ RCA kit. Vendor: Expedeon. Catalog number: 390100
15. T7 endonuclease I. Vendor: New England Biolabs, Inc. Catalog number: M0302S.
16. g-TUBE. Vendor: Covaris. Catalog number: 010145
17. NEBNext® FFPE DNA Repair Mix. Vendor: New England Biolabs Inc. Catalog number: M6630S
18. Ligation Sequencing Kit 1D. Catalog number: SQK-LSK108 and/or Ligation Sequencing Kit 1D2. Catalog number: SQK-LSK308. Vendor: Oxford Nanopore Technologies
19. Flow Cell (R9.4) and/or Flow Cell (R9.5). Vendor: Oxford Nanopore Technologies

#### **Equipment required:**

1. PCR thermocycler from any vendor
2. PCR hood
3. Thermal mixer with appropriate blocks from any vendor
4. Pipettes from varying volumes range from any vendor
5. Centrifuge for 2 ml and 0.2 ml tubes from any vendor
6. MinION™ Mk1b device and compatible personal computer

**Step 1: PCR amplification of 16S rRNA gene.**

1. Combine the following components using volumes below or as appropriate for your experiment in a PCR tube.
  - a. Q5® High-Fidelity 2X Master Mix: 12.5 µl
  - b. Forward primer (10 pmol): 0.8 µl
  - c. Reverse primer: (10 pmol): 0.8 µl
  - d. Template DNA: 1 µl
  - e. Nuclease-free water: 9.9 µl.
2. Amplify PCR reaction mix at the following PCR conditions:

| Segment              | Temp (°C) | Time (sec) | Cycles |
|----------------------|-----------|------------|--------|
| Initial denaturation | 98        | 00:30      | 1      |
| Denaturation         | 98        | 00:05      | 20     |
| Annealing            | 59        | 00:10      |        |
| Extension            | 72        | 00:35      |        |
| Final extension      | 72        | 02:00      | 1      |
| Hold                 | 8         | 00:00      | 1      |

**Step 2: PCR product clean up.**

1. Follow vendor instructions (MAGBIO) to clean PCR product at 0.45x bead ratio as described at the following URL:  
<http://www.magbiogenomics.com/image/data/Literature/Protocols/HighPrep%20PCR%20Protocol.pdf>

**Step 3: PCR product concentration estimation.**

1. Follow vendor instructions (ThermoFisher) to determine the concentration of cleaned PCR product using Qubit™ dsDNA HS Assay kit as described at the following URL:  
[https://assets.thermofisher.com/TFS-Assets/LSG/manuals/Qubit\\_dsDNA\\_HS\\_Assay\\_UG.pdf](https://assets.thermofisher.com/TFS-Assets/LSG/manuals/Qubit_dsDNA_HS_Assay_UG.pdf)

**Step 4: Self-ligation for the formation of plasmid-like structure.**

1. Dilute PCR product from step 2 to 2-3 ng/µl using nuclease-free water
2. Mix 55 µl of diluted PCR product with 5 µl of Blunt/TA Ligase Master Mix in 0.2 ml PCR grade tubes
3. Gently mix by flicking the tube a few times
4. Centrifuge tube for 10 seconds
5. Incubate for 10 min at 15°C in a PCR thermocycler
6. Gently mix by flicking the tube a few times
7. Centrifuge tube for 10 seconds
8. Incubate for another 10 min at room temperature.

**Step 5: Reverse phase cleanup.**

1. Vortex HighPrep™ PCR paramagnetic bead solution
2. Transfer 50 µl of bead solution into clean DNA LoBind 1.5 ml tube

3. Place the tube on a magnetic rack until beads separate from the liquid
4. While the tube is on the magnetic rack, remove 25  $\mu$ l of liquid from the tube using sterile pipette tip, taking care not to disturb the beads
5. Remove the tube from magnetic rack and gently vortex to resuspend the beads.
6. Add the self-ligation mix from step 4 to concentrated beads at a ratio of 0.35x bead ratio.
7. Incubate the mixture for 3 minutes at room temperature.
8. Place tube on a magnetic rack
9. Allow the beads to separate from the liquid. The beads contain long linear amplicons (potentially chimeric amplicons) while the liquid contains short linear amplicon and plasmid-like structures. Carefully remove the clear liquid from the tube and move it to step 6.

#### **Step 6: Plasmid and short amplicon clean-up.**

1. Follow vendor instructions (MAGBIO) to clean plasmid and short amplicon mix at 0.45x bead ratio as described at the following URL:  
<http://www.magbiogenomics.com/image/data/Literature/Protocols/HighPrep%20PCR%20Protocol.pdf>

#### **Step 7: Removal of linear molecules from plasmid mix.**

1. Combine 42  $\mu$ l of clean product from step 6 (eluted in nuclease-free water) with 2  $\mu$ l of 25 mM ATP solution, 5  $\mu$ l of 10X reaction buffer and 1  $\mu$ l of Plasmid-Safe DNase in 0.2 ml PCR grade tube. The last three ingredients are provided with the Plasmid-Safe<sup>TM</sup> ATP-Dependent DNase kit.
2. Incubate at 37°C for 15 minutes in a PCR thermocycler
3. Clean product as described in Step 2
4. Determine the concentration of DNA in the cleaned product as described in Step 3.

#### **Step 8: Rolling Circle Amplification (RCA).**

Perform RCA in triplicate for each sample and include negative controls using nuclease-free water instead of cleaned product from step 7. Below are reaction conditions and volumes for a single RCA reaction:

1. Combine 2.5  $\mu$ l of cleaned product from step 7 with 2.5  $\mu$ l of Buffer D (provided with TruePrime<sup>TM</sup> RCA kit) in 0.2 ml PCR grade tube and incubate at room temperature for 3-5 minutes
2. While the sample is being incubated, prepare the amplification mix consisting of 9.3  $\mu$ l of nuclease-free water, 2.5  $\mu$ l of reaction buffer, 2.5  $\mu$ l of dNTPs, 2.5  $\mu$ l of Enzyme 1 and 2.5  $\mu$ l of Enzyme 2. All ingredients are included in the TruePrime<sup>TM</sup> RCA kit
3. After 10 minutes, add 2.5  $\mu$ l of Buffer N (provided with TruePrime<sup>TM</sup> RCA kit) and prepared amplification mix to the tube
4. Mix by pipetting and incubate tube at 30°C for 150 minutes.
5. Follow Step 3 to determine the concentration of DNA in samples and negative controls.

#### **Step 9: Enzymatic de-branching.**

1. Combine triplicate reactions from step 8 into a single 0.2 ml PCR grade tube
2. Mix thoroughly to prepare single RCA product per sample

3. Combine 65  $\mu$ l of RCA product with 2  $\mu$ l of T7 endonuclease I and incubate at room temperature for 5 minutes.

**Step 10: Mechanical fragmentation.**

1. Transfer enzymatically de-branched RCA product into g-TUBE using wide bore pipette tips
2. Centrifuge at 1800 rpm for 4 minutes or until entire reaction mix passes through the fragmentation hole
3. Reverse the g-TUBE and centrifuge again at 1800 rpm for 4 minutes or until entire reaction mix passes through the fragmentation hole
4. Clean product with as described in Step 5, with the exception that the clear liquid after bead separation is discarded and bead-bound DNA is eluted according to vendor outlined protocol
5. Repeat step 9 (i.e. Enzymatic de-branching) on the g-TUBE fragmented product.
6. Clean product as described in Step 5, with the exception that the clear liquid after bead separation is discarded and bead-bound DNA is eluted according to vendor outlined protocol.

**Step 11: DNA Damage repair.**

1. Combine 53.5  $\mu$ l of product from Step 10 with 6.5  $\mu$ l of FFPE DNA Repair Buffer and 2  $\mu$ l of NEBNext FFPE Repair mix in a 0.2 ml tube
2. Incubate at 20°C for 15 minutes
3. Clean product as described in Step 2
4. Quantify DNA concentration as described in Step 3.

**Step 12: DNA library preparation and nanopore sequencing.**

1. Prepare 2D or 1D2 libraries for nanopore sequencing according to the protocols described for the SQK-LSK108 or SQK-LSK308 kits by Oxford Nanopore Technologies.
2. Primer appropriate flow cell using protocols outlined by Oxford Nanopore Technologies.
3. Finally, sequence the prepared libraries on appropriate flow cells as outlined by Oxford Nanopore Technologies.

**Table S1:** Names and DSM catalog numbers of bacteria used to construct mock communities for the single organism and ten organism experiments and their corresponding accession numbers are shown below. The 16S rRNA genes were extracted from genome assemblies using RNAmmer<sup>1</sup> for bacteria for use in estimation of sequencing accuracy. Where genome assemblies were unavailable, the 16S rRNA gene sequence in Genbank was utilized.

| Organism name                     | DSM catalog number | Genbank assembly accession number | 16S rRNA gene accession number |
|-----------------------------------|--------------------|-----------------------------------|--------------------------------|
| <b>One organism experiment</b>    |                    |                                   |                                |
| <i>Listeria monocytogenes</i>     | 19094              | HE999705.1                        |                                |
| <b>Ten organism experiment</b>    |                    |                                   |                                |
| <i>Aquimarina intermedia</i>      | 17527              | -                                 | AM113977                       |
| <i>Bacteroides vulgatus</i>       | 1447               | CP000139                          | -                              |
| <i>Desulfosporosinus orientis</i> | 765                | CP003108                          | -                              |
| <i>Flectobacillus major</i>       | 103                | ATXY00000000                      | -                              |
| <i>Legionella pneumophila</i>     | 7513               | AE017354                          | -                              |
| <i>Listeria monocytogenes</i>     | 19094              | HE999705.1                        | -                              |
| <i>Meiothermus ruber</i>          | 1279               | CP001743                          | -                              |
| <i>Propionibacterium acnes</i>    | 16379              | AE017283                          | -                              |
| <i>Pseudomonas aeruginosa</i>     | 1128               | NC_009656                         | -                              |
| <i>Spirosoma linguale</i>         | 74                 | CP001769                          | -                              |

1 Lagesen, K. *et al.* RNAmmer: consistent and rapid annotation of ribosomal RNA genes. *Nucleic Acids Research* **35**, 3100-3108, (2007).

**Figure S1:** Violin plots showing the read length distribution of raw data (i.e., post base calling with Albacore 1.2.4), and the number of concatemers on each base called read estimated using read lengths from INC-Seq processing using the “blastn” alignment approach for all four experiments involving both 2D and 1D2 chemistry.

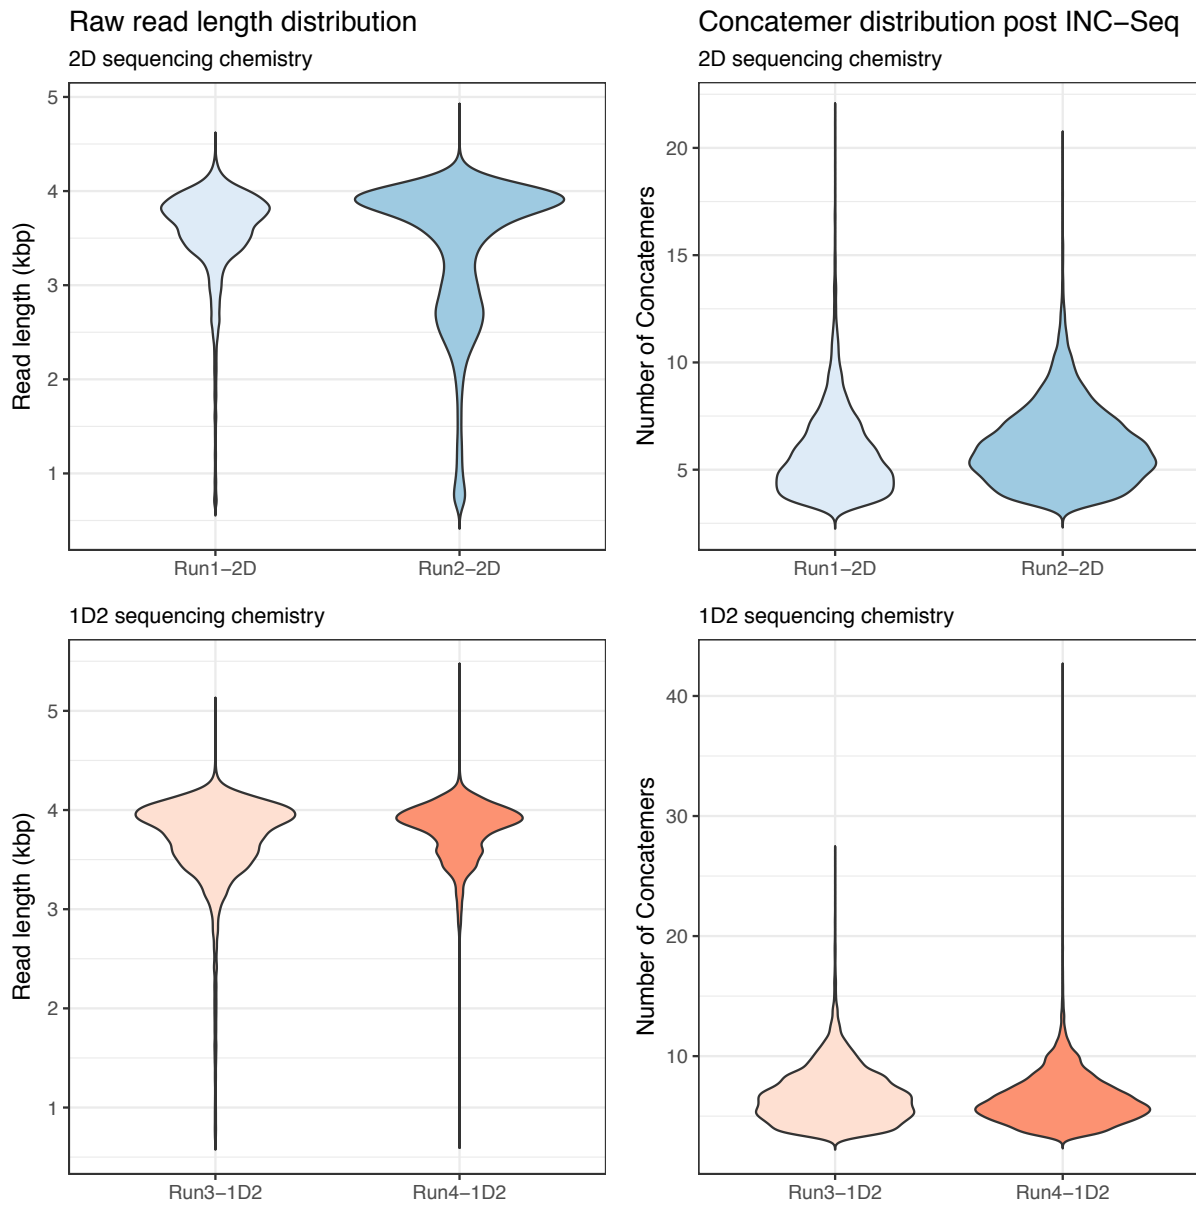

**Figure S2:** Violin plot of read length distributions for INC-Seq processed reads, chopSeq corrected reads after tandem repeat removal, and post-size-selection of chopSeq corrected reads and size selected reads (chopSeq\_SS) for one organism experiments using both 2D and 1D2 sequencing chemistry.

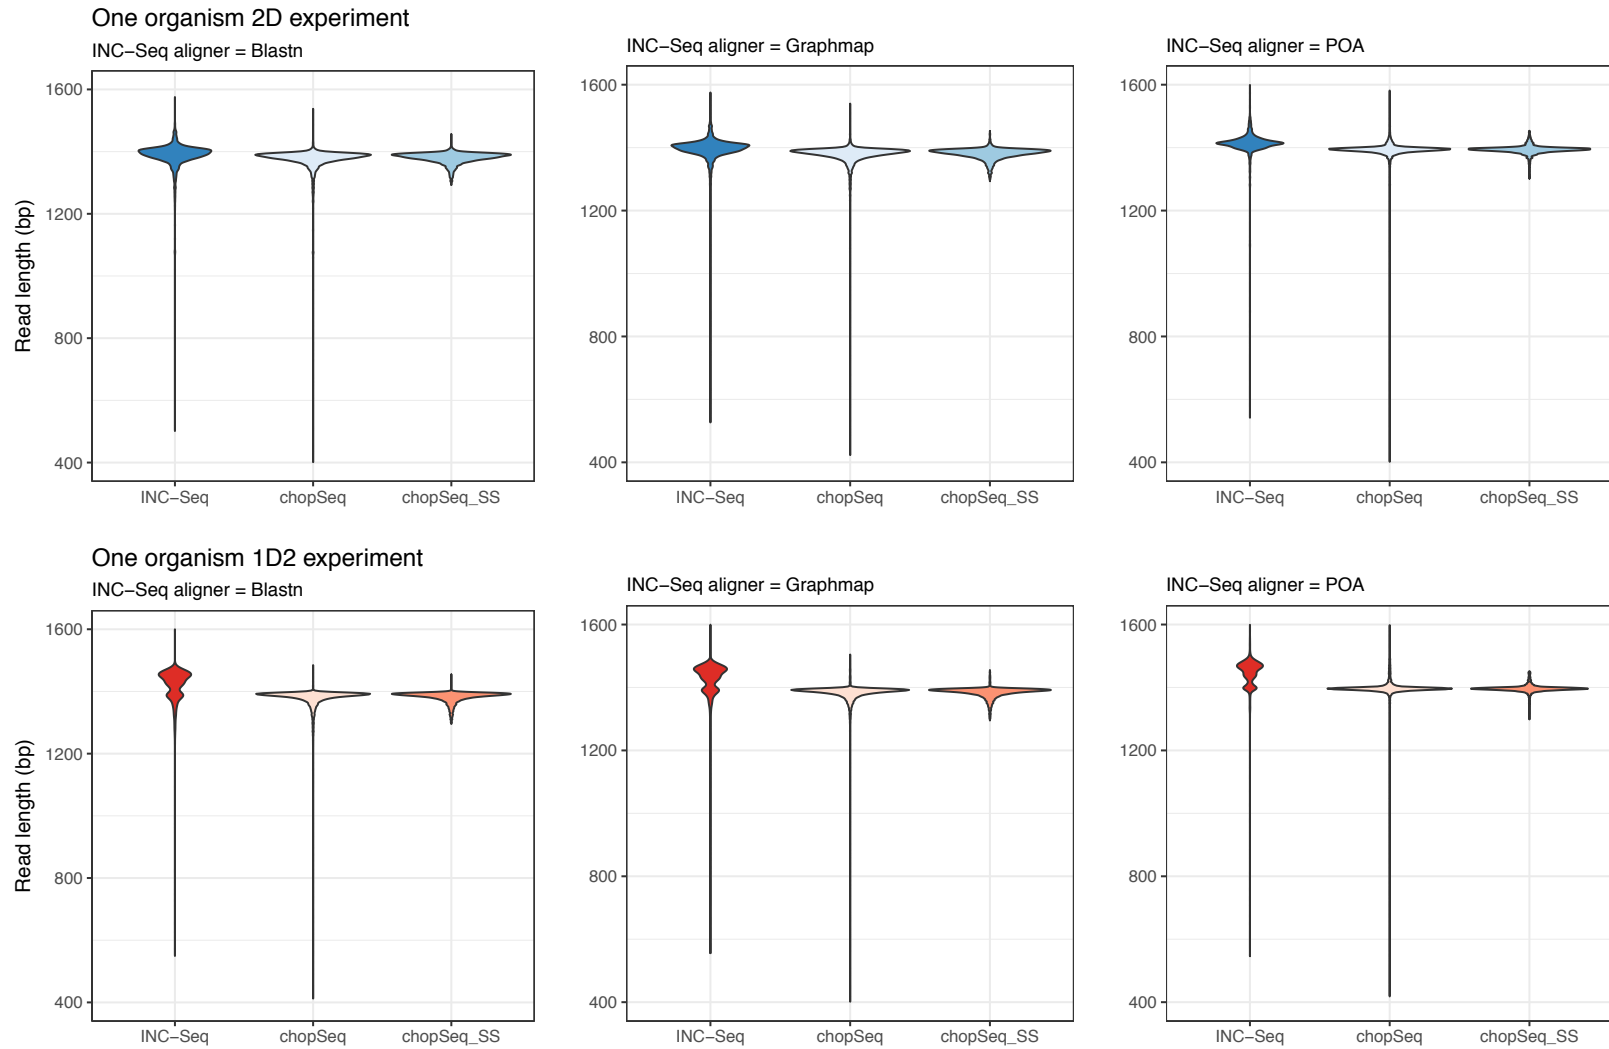



**Figure S3:** Consensus sequences from OTUs from Run 3 (1D2 sequencing chemistry, INC-Seq aligner: blastn) were combined with reference sequences and aligned using muscle (default parameters) and Neighbor-Joining tree using Jukes-Cantor model was constructed in Geneious (version 8) using 100 bootstraps. Reference sequences are labelled in green, and OTUs are labelled in red.

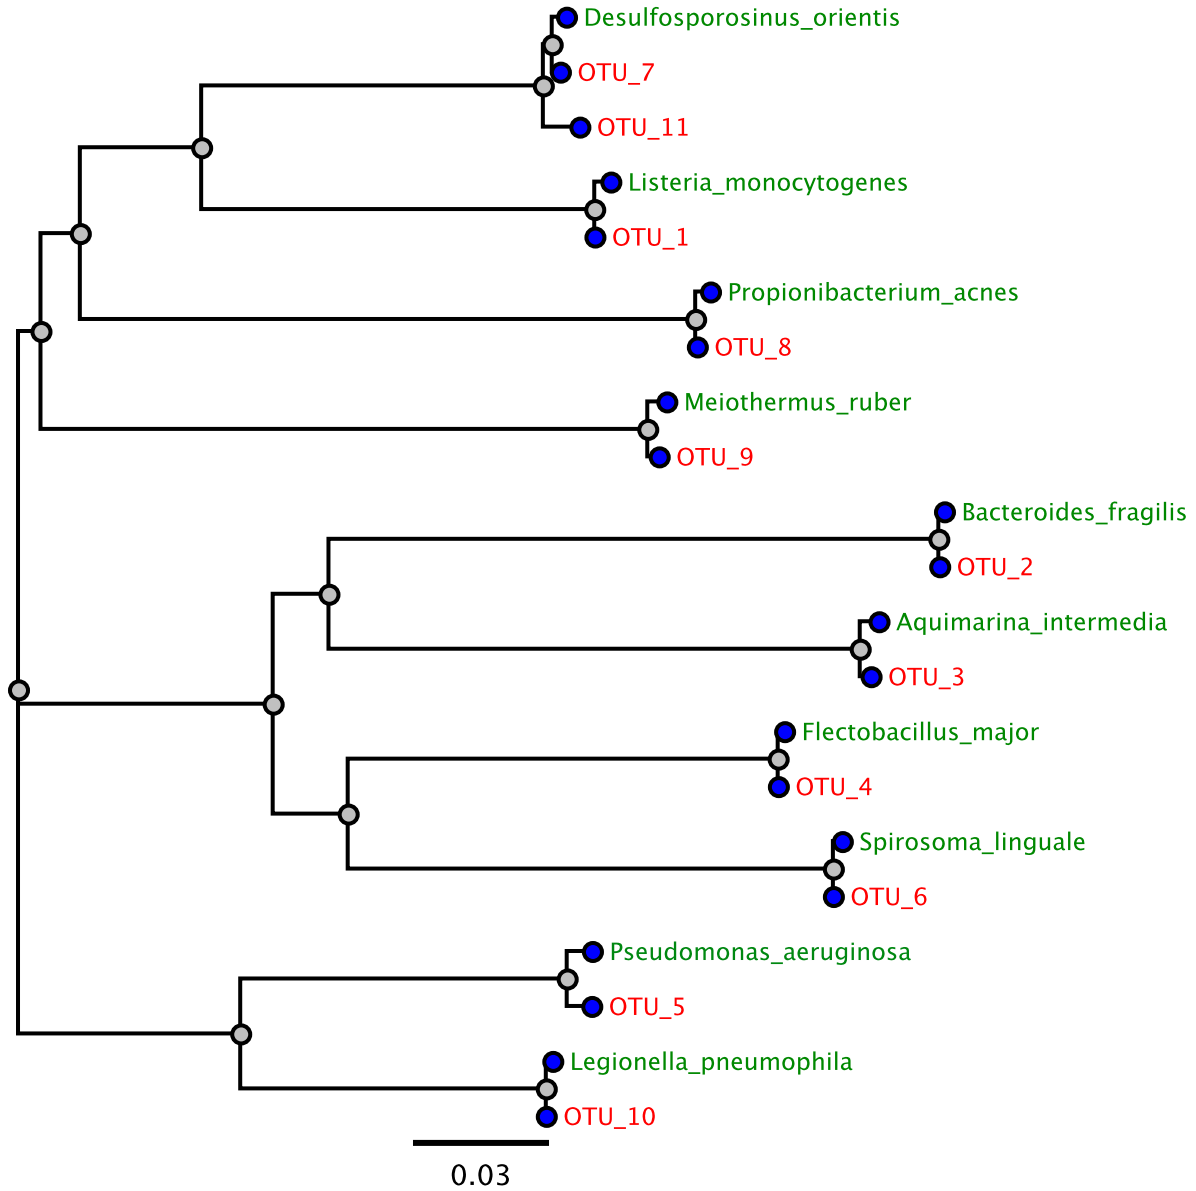

**Figure S4:** Example Bioanalyzer traces of de-branched product pre- and post-cleanup. The post-cleanup product was then treated for gap filling and DNA damage repair prior to being used for library preparation of sequencing according to ONT protocol for 2D and 1D2 chemistries.

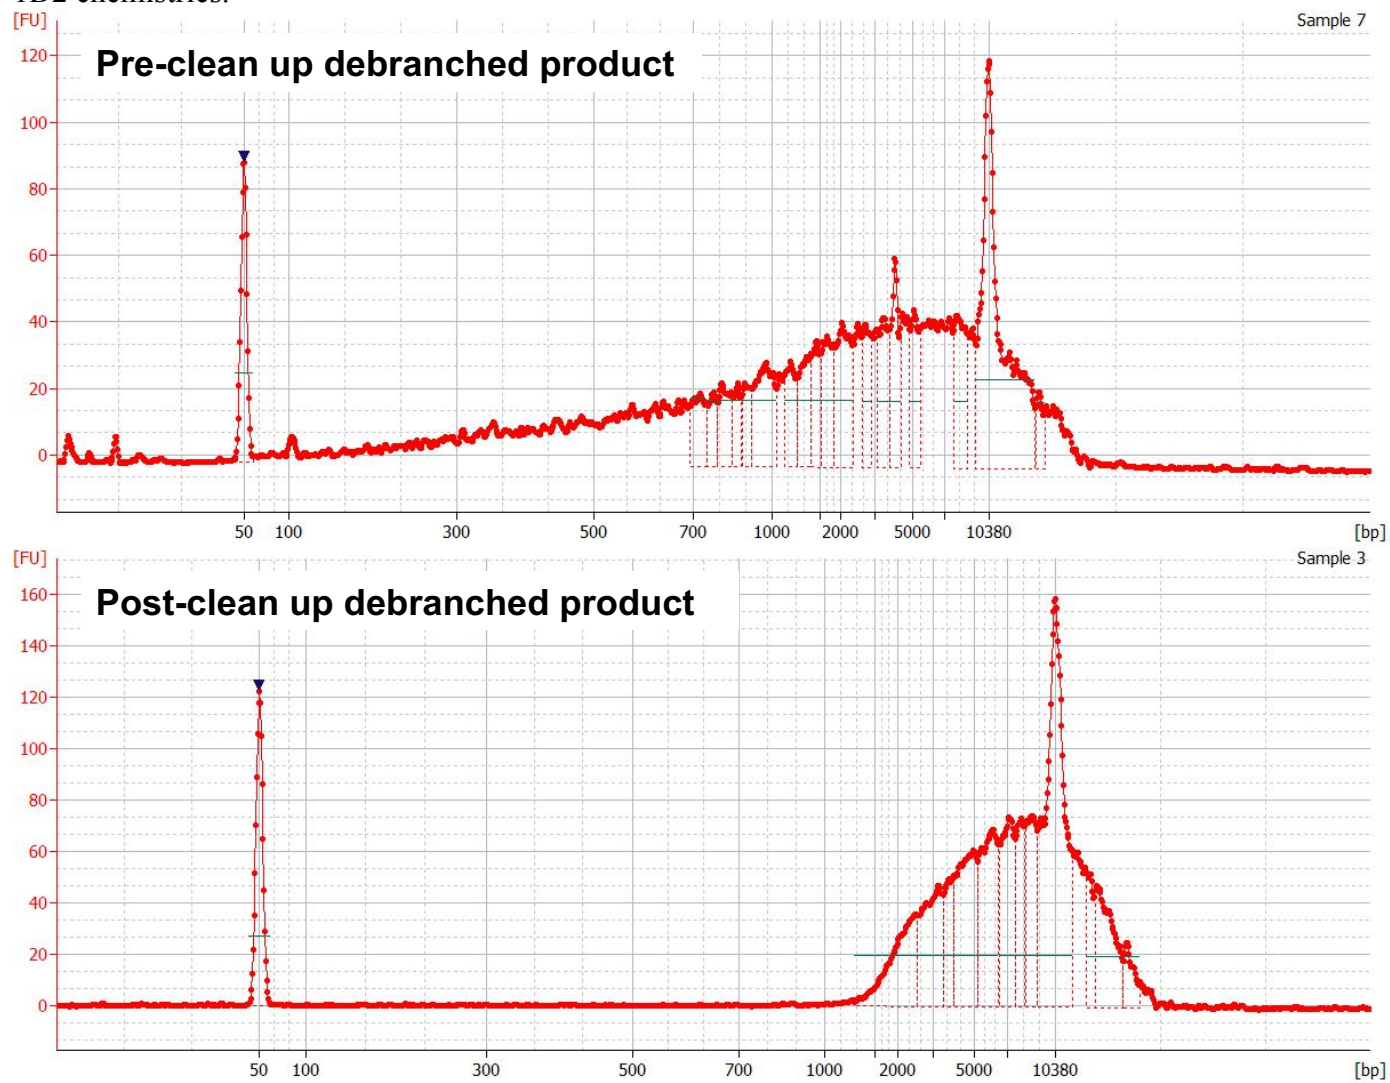

Source: https://www.biorxiv.org/content/10.1101/244517v2.full.pdf
